1 Anatomically precise relationship between specific amygdala connections and  
2 selective markers of mental well-being in humans

3 Author names and affiliations

4 Miriam C Klein-Flügge<sup>1,2\*</sup>, Daria EA Jensen<sup>1,3</sup>, Yu Takagi<sup>2,3</sup>, Lennart Verhagen<sup>1,2,4</sup>, Stephen M Smith<sup>2</sup>,  
5 Matthew FS Rushworth<sup>1,2</sup>

6 1 Wellcome Centre for Integrative Neuroimaging (WIN), Department of Experimental Psychology,  
7 Tinsley Building, Mansfield Road, Oxford OX1 3TA, University of Oxford, UK

8 2 Wellcome Centre for Integrative Neuroimaging (WIN), Centre for Functional MRI of the Brain  
9 (FMRIB), University of Oxford, Nuffield Department of Clinical Neurosciences, Level 6, West Wing,  
10 John Radcliffe Hospital, Oxford OX3 9DU, UK

11 3 Department of Psychiatry, University of Oxford, Warneford Hospital, Warneford Lane, Oxford OX3  
12 7JX, UK

13 4 Donders Institute for Brain, Cognition and Behaviour, Radboud University, Nijmegen, 6525 HR, the  
14 Netherlands

15

16 \*Corresponding author: Miriam C Klein-Flügge ([miriam.klein-flugge@psy.ox.ac.uk](mailto:miriam.klein-flugge@psy.ox.ac.uk), @MKFlugge)

## 17 Abstract

18 There has been increasing interest in using neuroimaging measures to predict psychiatric  
19 disorders. However, predictions usually rely on large numbers of brain connections and large  
20 disorder heterogeneity, thus lacking both anatomical and behavioural specificity, preventing  
21 the advancement of targeted interventions. Here, we address both challenges. First, using  
22 resting-state functional MRI, we parcellated the amygdala, a region implicated in mood  
23 disorders but difficult to image with high fidelity, into seven nuclei. Next, a questionnaire  
24 factor analysis provided four sub-clinical latent behaviours frequently found in anxious-  
25 depressive individuals, such as negative emotions and sleep problems. Finally, for each latent  
26 behaviour, we identified the most predictive connections between individual amygdala nuclei  
27 and highly specific regions of interest e.g. dorsal raphe nucleus in the brainstem or medial  
28 prefrontal cortical regions. A small number of distinct connections predicted behaviours,  
29 providing unprecedented levels of specificity, in humans, for relating mental well-being to  
30 precise anatomical connections.

## 31 Introduction

32 It has become increasingly popular, in recent years, to use measures derived *in vivo* from  
33 human magnetic resonance imaging (MRI) to predict health outcomes, including measures of  
34 mental well-being. For example, resting-state functional MRI (rs-fMRI) connectivity measures  
35 can predict whether a person suffers from, or will respond to treatment for, Generalized  
36 Anxiety Disorder (GAD), Major Depressive Disorder (MDD), and obsessive-compulsive  
37 disorders (OCD) <sup>1-5</sup>. The prediction accuracies achieved in these types of studies are often  
38 impressive and typically reach values between 60-80%. Yet, in the large majority of cases,  
39 predictions rely on a large number of brain regions, networks or connections. Hence the  
40 impressive prediction accuracies come at the significant cost of reduced anatomical  
41 specificity.

42 Despite the critical importance of such studies for diagnosis and prognosis, a lack of  
43 anatomical specificity may be problematic when the aim is a mechanistic understanding of  
44 the disease to support targeted treatment interventions. Identification and characterization  
45 of specific circuits may be necessary for establishing the nature and variants of the illness and  
46 it may be critical for developing new treatments that involve manipulation of brain activity in  
47 specific circuits.

48 A second problem is that unsupervised decoding methods, although powerful, are  
49 often agnostic to anatomical priors. Yet a large body of evidence has established the roles of  
50 specific neurotransmitter systems and particular brain regions in mediating important  
51 functions implicated in mental health. Limbic structures that mediate emotional processing  
52 and their connections with prefrontal regions are consistently reported to play an important  
53 role and one key hub within this network is the amygdala <sup>6-11</sup>. Removal or disruption of this  
54 region reduces fear and anxiety responses <sup>10,12-14</sup>. Positron-emission tomography in  
55 depressed patients shows abnormal metabolism in amygdala and connected subgenual  
56 prefrontal cortex <sup>7,10,15</sup>. And the amygdala is one of the key regions for regulating and  
57 expressing emotions <sup>6,10,12,16-18</sup>. An aim in the current study was, therefore, to examine the  
58 degree to which it is possible to explain variance in mental well-being across humans,  
59 including social and emotional behaviour, in relation to the functional connectivity of  
60 identifiable neural circuits – those centred on the amygdala. The monosynaptic connections  
61 of the amygdala to specific cortical and subcortical regions have been established for some

62 time in animal models including primates <sup>19</sup> and there is increasing knowledge of the  
63 behaviours mediated by amygdala interactions <sup>11,13,20,21</sup>.

64 If, however, a decision is taken to focus on a brain region such as the amygdala then  
65 a third problem arises. Many of the key brain areas with which it interacts are in the brainstem  
66 where it has been difficult to image activity. Moreover, such regions have very specific  
67 connections to particular sub-nuclei within the amygdala. Therefore, our first step was to  
68 parcellate the human amygdala into constituent functional sub-units. We took advantage of  
69 the high-quality data acquired as part of the human connectome project (HCP; <sup>22</sup>). Using  
70 resting-state measures from 200 healthy participants, we reliably identified seven amygdala  
71 nuclei within each hemisphere. We also invested considerable effort in developing a refined  
72 data pre-processing pathway that focused on the removal of breathing related artefacts that  
73 allowed us to examine activity even in brainstem regions, several of which exhibit very specific  
74 interactions with particular amygdala subnuclei.

75 In tandem with improving anatomical specificity we also aimed to tackle another  
76 major problem in relating baseline neural measures to mental well-being. Namely, the  
77 disorders themselves are ill-defined and span a broad range of impairments which are not  
78 consistently present in all patients diagnosed with the same disorder <sup>23</sup> and which are partly  
79 overlapping between disorders. This may be another reason why a classifier trained to  
80 distinguish a depressed from a non-depressed person is likely to reveal a broad network of  
81 regions instead of mapping onto well-defined and anatomically interpretable brain circuits. If  
82 we are able to focus on specific rather than broad symptom categories, we may better be  
83 able to relate them to specific brain circuits. Because of the sample we examined, mental  
84 health varied on a sub-clinical scale. Nevertheless, we were able to define latent behaviours  
85 by applying a factor analysis to a large number of questionnaire scores which captured four  
86 aspects of mental well-being. In our final and most critical step, we selected the best  
87 predictors in terms of connections between amygdala nuclei and other brain regions for each  
88 latent measure of mental well-being. We showed that a few specific connections predicted a  
89 reliable portion of the variance in each latent behaviour. Our study provides the first evidence  
90 in a large pool of healthy participants that using an anatomically informed approach and a  
91 more sensitive characterization of the behavioural phenotypes related to mental well-being,

92 we can identify a small set of brain connections that can be used to predict latent aspects of  
93 mental well-being.

## 94 Results

### 95 *In vivo* parcellation of the human amygdala into seven anatomically plausible nuclei

96 *Post-mortem* histological examination in humans and other species has established that the  
97 amygdala is composed of anatomically distinct nuclei. Our first aim, therefore, was to use rs-  
98 fMRI to provide the best possible *in vivo* parcellation of human amygdala into its nuclei.  
99 Previous work in humans *in vivo* has delineated two or three subdivisions within the amygdala  
100 (e.g. basolateral versus centromedial)<sup>24–27</sup>. However, given the quality of the HCP data (e.g.,  
101 improved sequences, 2mm isotropic resolution, 0.7s temporal resolution, ~1h rs-fMRI per  
102 person<sup>28</sup>), and as a result of the enhanced processing steps we took to remove physiological  
103 confound signals, we reasoned that we might reliably identify a more detailed pattern of  
104 anatomical organization within the amygdala.

105 We generated a group connectome using carefully pre-processed rs-fMRI data from a  
106 subset of 200 HCP participants. Additional pre-processing focussed on removal of  
107 physiological artefacts and led to gains in temporal signal-to-noise (tSNR) in amygdala and  
108 many of its projection targets and sources, e.g., medial temporal lobe areas, subgenual  
109 prefrontal cortex, and most prominently subcortical and brainstem structures (see Methods  
110 and **Supplementary Fig 1, A-B**). We did not include all 1206 HCP participants because these  
111 additional pre-processing steps required good quality physiological recordings of respiration  
112 and cardiac activity which were not available in the remaining participants. The resulting  
113 group connectome, containing the average functional connectivity between each pair of  
114 brain-ordinates, therefore provided high-fidelity connectivity estimates of otherwise difficult  
115 to image regions. This is, for example, illustrated by the average amygdalae to whole brain  
116 connectivity (**Fig 1A**), which, in line with previous work<sup>19</sup>, highlights overall strong functional  
117 coupling between the amygdala and lateral temporal and temporal pole regions, ventral  
118 caudal medial frontal cortex (BA32 and BA25), thalamus, hypothalamus, and ventral striatum.

119 To identify subdivisions within the amygdala, hierarchical clustering was performed  
120 on the similarity of the whole-brain connectivity pattern between amygdala voxels. This  
121 resulted in parcellations of the amygdalae into increasing numbers of clusters. By carefully  
122 comparing the location and size of the obtained clusters to known anatomical subdivisions of  
123 the amygdala and using heuristics such as symmetry across hemispheres (see Methods), we

124 chose a parsimonious and anatomically plausible parcellation for further analyses. This  
125 parcellation contained seven subdivisions in each hemisphere (Fig 1B; see Supplementary Fig  
126 1D for other depths of clustering).

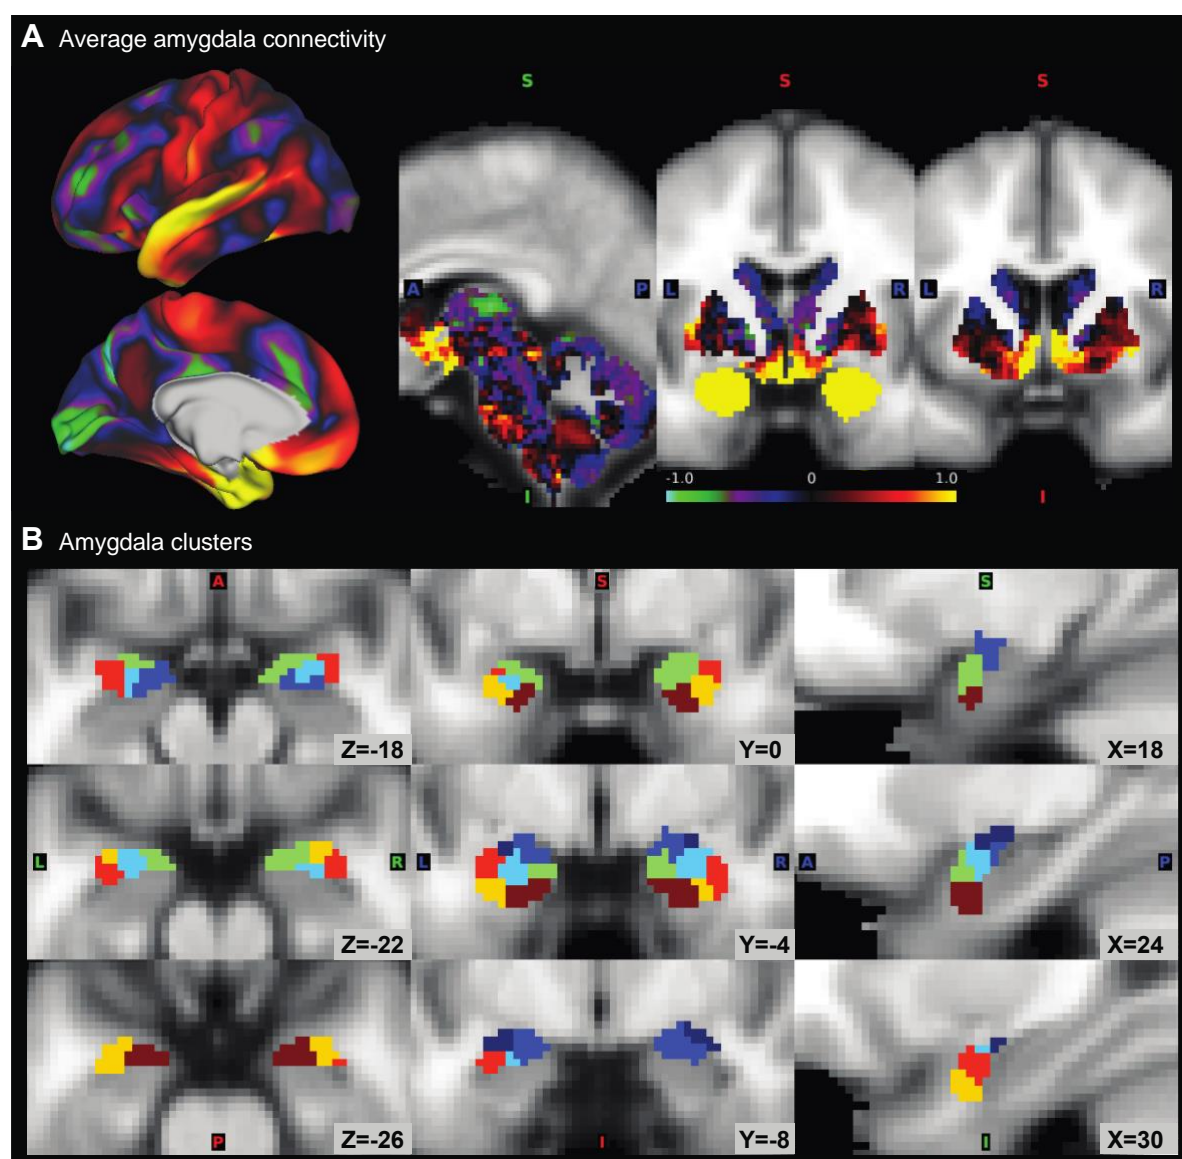

127

128 **Figure 1, Average amygdala connectivity and definition of amygdala clusters,**  
129 **A**, A group connectome was generated from resting-state fMRI (rs-fMRI) data of 200  
130 HCP participants using an improved pre-processing pipeline to correct for  
131 physiological noise (Fig S1). The average functional coupling of all amygdala voxels  
132 to the rest of the brain, corrected for global absolute coupling strength, shows  
133 patterns that would be expected from tracer studies, for example strong connectivity  
134 of the amygdalae with subgenual ACC, hypothalamus, and ventral striatum. **B**,  
135 Hierarchical clustering was performed on the similarities between the whole-brain  
136 functional connectivity patterns of different amygdala voxels to identify amygdala  
137 subdivisions sharing connectivity profiles. Seven sub-divisions were identified (left:  
138 horizontal; middle: coronal; right: sagittal view), showing strong symmetry across  
139 hemispheres and strong resemblance with subdivisions identified from histology and  
140 high-resolution *post-mortem* structural neuroimaging.

141 Several interesting features naturally emerged in this parcellation. First, clusters were  
142 nearly symmetrical across left and right hemispheres (**Fig 1B**). Importantly, this was not the  
143 consequence of constraints enforced by the clustering algorithm, and yet matched  
144 expectations from anatomical work because neurons with similar projection patterns tend to  
145 cluster in space, and inter-hemispheric similarities in the connection patterns of a given  
146 nucleus in each hemisphere outweigh their differences. Second, another naturally emerging  
147 feature of the data, again consistent with expectations from histological analysis, was that  
148 clusters were spatially cohesive but differed in size. For instance, a putative central nucleus  
149 contained 30 voxels per hemisphere, but the ventrolateral nucleus contained 50 voxels.  
150 Finally, the clusters were located in such a way that a clear progression from ventro-lateral to  
151 dorso-medial and from ventral-anterior to dorsal-posterior could be observed, thus  
152 corresponding to organizational principles reported previously (**Figure 1B**; <sup>29</sup>).

153 To facilitate links to other studies, we assigned each cluster a putative label,  
154 corresponding to nuclei that have previously been identified (see Methods). As a guide, we  
155 used the best match in size and position when comparing our clusters with several atlases of  
156 the human amygdala <sup>29-31</sup> (**Fig 2A**). The seven nuclei were labelled central nucleus (Ce),  
157 cortical nuclei (CoN), auxiliary basal nucleus (AB), basal nucleus (B), and lateral nuclei (ventral  
158 portion: LaV, intermediate portion: LaI, dorsal portion: LaD).

159 One of the main aims of this study was to identify specific connections between  
160 amygdala nuclei and other brain regions that help regulate functions implicated in mental  
161 health variation (e.g. sleep and emotion variation). To identify regions of interest (ROIs) with  
162 which the amygdala interconnects, we therefore focussed on regions central to these  
163 processes (**Fig 2C**) and with known mono- or di-synaptic connectivity with the amygdala. In  
164 the brainstem, we defined ROIs in locus coeruleus (LC), dorsal and median raphe nuclei (DRN,  
165 MRN), dorsal and ventrolateral periaqueductal grey (dPAG, vPAG), and substantia nigra (SN).  
166 Subcortically in the forebrain, we included the bed nucleus of the stria terminalis (BNST) and  
167 the nucleus accumbens (NAc). In cortex, we focussed on medial areas 24, 25, 32, 9m,  
168 posterior OFC, and frontal operculum (FOP) which, on the basis of their similarities with areas  
169 in the monkey brain are most likely to be connected with amygdala <sup>32</sup>. We also considered  
170 the prefrontal areas 46 and 9/46 on the lateral surface because stimulating them both affects  
171 amygdala threat-related reactivity <sup>33</sup>. We used ROIs from the recent parcellation by <sup>34</sup> which



172 further subdivides area 24 into a24, p24, and a24pr (the most posterior mid-cingulate region  
173 p24pr was not included), area 32 into s32, p32, d32, a32pr, and p32pr, frontal operculum into  
174 FOP1-5, and area 9/46 into 9-46d, a9-46v, and p9-46v, and which identifies a pOFC region (for  
175 more details, see Methods and **Fig 2C**). For subcortical ROIs, we used established ROIs from  
176 published atlases (see Methods) because contrast-based delineation of brainstem nuclei was  
177 not available as part of the HCP data.

178 **Fig 2B** shows the average functional connectivity from each of the seven amygdala  
179 nuclei, merged across hemispheres, to the above-defined 28 cortical, subcortical and  
180 brainstem ROIs. While functional connectivity is strongly influenced by the presence of a  
181 monosynaptic connection between areas and plastic changes in those pathways, it also  
182 reflects multi-synaptic interactions between regions <sup>35</sup>. Nevertheless, the pattern of  
183 functional connectivity observed from the amygdala nuclei exhibited several features  
184 reminiscent of animal tracer studies: all amygdala nuclei had strong coupling with areas in  
185 ventral, caudal medial frontal cortex and caudal orbitofrontal cortex, including areas 25,  
186 pOFC, and s32 as might be expected from non-human primate studies <sup>19,36,37</sup>. Coupling to  
187 these regions was strongest for the basal (B, AB) and cortical nuclei (CoN). The same amygdala  
188 nuclei had strong coupling with lateral prefrontal regions (46 and 9/46), but the sign was  
189 inverted, suggesting negatively correlated BOLD fluctuations. Given the limited connections  
190 between the homologue of this region and the amygdala in macaques, it is likely that the  
191 negative coupling found between them reflects an indirect interaction mediated by another  
192 brain region. In stark contrast, the central (Ce) nucleus had the strongest connectivity to the  
193 majority of subcortical and brainstem regions such as NAc or dPAG.

### A Naming of nuclei

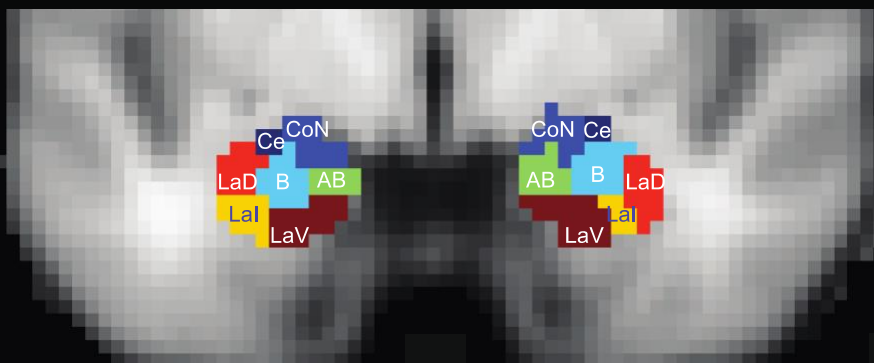

### B Strength of functional coupling (group average)

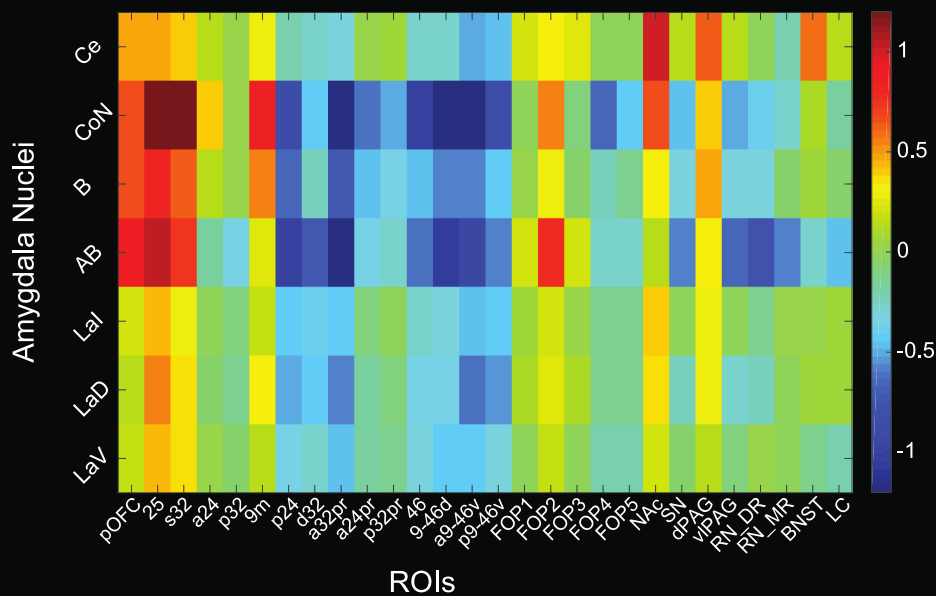

### C Regions of interest (ROIs)

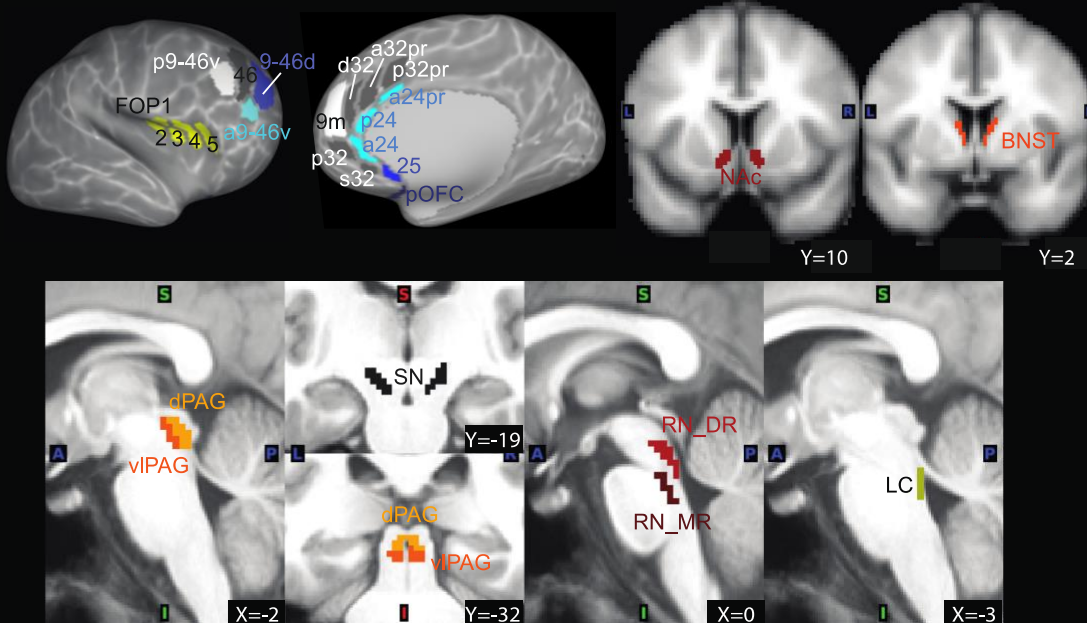

195 **Figure 2, Amygdala nuclei and their profile of connectivity to regions of**  
196 **interest, A,** Labels assigned to the seven amygdala subdivisions obtained from  
197 hierarchical clustering: Ce = central nucleus, CoN = cortical nuclei, B = basal, AB =  
198 auxiliary basal, LaV = lateral (ventral part), Lal = lateral (intermediate part), LaD =  
199 lateral (dorsal part). **B,** Average resting-state connectivity from the seven nuclei to 28  
200 regions of interest (ROIs) defined *a priori* based on their potential role in regulating  
201 emotions and mental well-being. This highlights strong coupling of subgenual cortex  
202 (area 25) to the entire amygdala, but particularly to basal subdivisions, in line with  
203 tracer work. Similar profiles are observed for posterior OFC (pOFC) and the  
204 subgenual portion of area 32 (s32). By contrast, subcortical and brainstem regions  
205 most strongly connect with the central nucleus as expected. **C,** Masks of all ROIs  
206 used in this study. For details on their definition, please refer to the Methods.  
207 NAc=Nucleus Accumbens; BNST=bed nucleus of the stria terminalis;  
208 vl/dPAG=ventrolateral/dorsal periaqueductal grey; SN=substantia nigra;  
209 RN\_DR/RN\_MR=dorsal and median raphe nuclei; LC=locus coeruleus. Definitions of  
210 cortical regions were taken from Glasser et al., 2016.

211

212 *Behaviour: latent factors capturing mental well-being*

213 Having established and validated the network of connections between amygdala nuclei and  
214 our ROIs, we sought a robust characterization of participants' mental well-being. While the  
215 HCP data set is not intended to include patients with clinical diagnoses relating to mental  
216 health and is therefore unlikely to include the extremes of the distribution, we reasoned that  
217 it might be possible to examine sub-clinical variance in the central range in mental health.  
218 We thus selected all behavioural scores available in the HCP data that captured aspects of  
219 emotional and psychological well-being, sleep quality, and personality type (see Methods). A  
220 total of 33 markers were included which involved measures from the NIH Toolbox 'Emotion'  
221 (subscales: Psychological well-being; Social relationships; negative affect; stress & self-  
222 efficacy), The Pittsburgh Sleep Questionnaire, the Big Five, and the UPenn Emotion  
223 Recognition Test. We reasoned that some scores were capturing similar behavioural  
224 phenotypes which might have an underlying common cause. To capture such common  
225 'latent' factors that produce these mental well-being scores, we performed a factor analysis  
226 which resulted in four main factors (see Methods; **Fig 3A**).

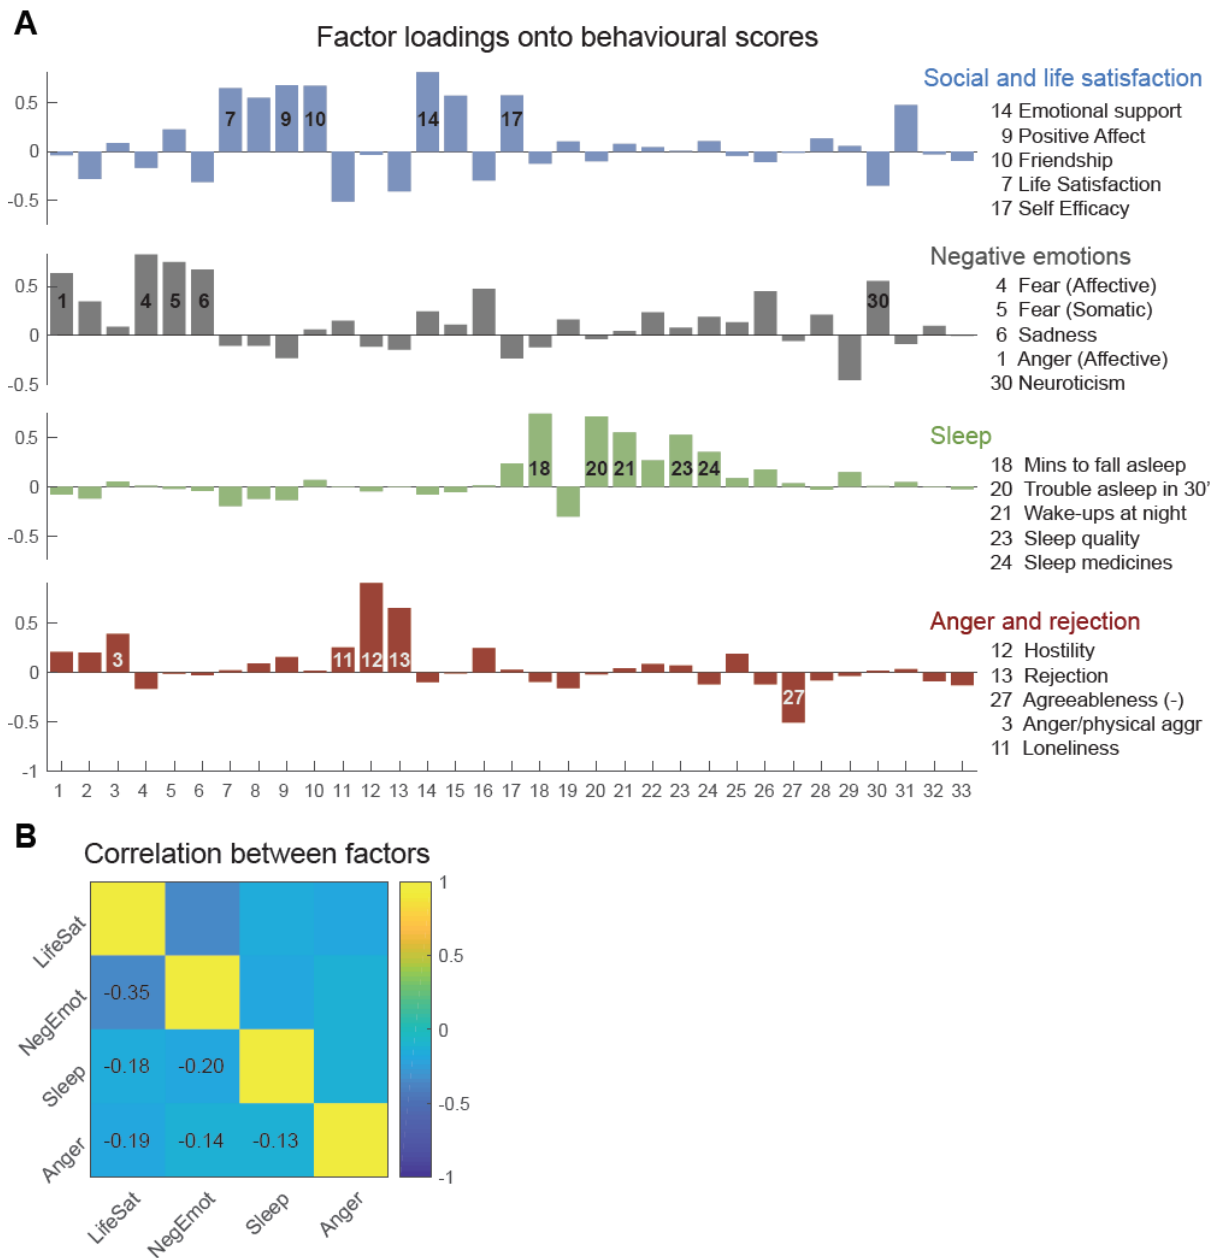

227

228 **Figure 3, Latent behaviours capture distinct aspects of mental well-being, A, A**  
 229 **factor analysis conducted based on 33 behavioural scores (Table 1) available as**  
 230 **part of HCP revealed four factors. The loadings for each factor are shown in different**  
 231 **colors, corresponding to the four rows. The highest five contributing behavioural**  
 232 **scores are shown in order of their contribution (absolute loading) on the right. This**  
 233 **shows that the four factors capture quite distinct aspects of participants' mental well-**  
 234 **being ('latent behaviours') which we summarized as 'Social and life satisfaction',**  
 235 **'Negative emotions', 'Sleep' (problems), 'Anger and rejection'. Importantly, the four**  
 236 **factors replicated when the factor analysis was performed on all 1206 HCP**  
 237 **participants (see Methods). B, Correlations between factors.**

238

239           The first factor emphasized the impact of social support and general life satisfaction,  
240 with a strong negative loading onto loneliness and positive loadings onto emotional support,  
241 friendship, life satisfaction and purpose (thus, cutting across the sub-scales of ‘psychological  
242 well-being’ and ‘social relationships’ within the NIH Toolbox). The second factor, by contrast,  
243 loaded strongly onto negative emotions, including fear, stress and sadness (all within the  
244 subscale ‘negative affect’ of the NIH Toolbox). The third factor loaded almost exclusively onto  
245 sleep-related markers, assessed as part of the Pittsburgh Sleep Questionnaire. It loaded  
246 negatively onto the amount of sleep but positively onto sleep troubles such as bad dreams,  
247 wakeups, and lack of sleep quality. Finally, the fourth factor loaded onto anger and physical  
248 aggression, hostility, and feelings of being rejected, including negative loadings onto  
249 agreeableness (**Fig 3A and Supplementary Fig 2; Table 1**).

250           We used the loadings from the four factors multiplied onto participants’ original 33  
251 scores to construct latent behaviours capturing these four dimensions of participants’ well-  
252 being. We summarized them as ‘social and life satisfaction’, ‘negative emotions’, ‘sleep’ and  
253 ‘anger & rejection’.

254

#### 255 *Relating latent behaviours capturing mental health to specific amygdala pathways*

256 In the next analysis step, we asked which of the above-defined connections between specific  
257 amygdala nuclei and ROIs carried information about mental well-being as captured by the  
258 four latent behaviours. For each of the four behaviours, we estimated a large number of  
259 regression models using in each case only a subset of connections as predictor variables. This  
260 approach has been used, for example, in analyses of human magnetoencephalography data  
261 (MEG; <sup>38</sup>), where recordings across MEG sensors are highly correlated. It is suitable when a  
262 large number of correlated regressors precludes simultaneous inclusion in one regression  
263 model. Instead of testing each predictor separately, including more than one regressor in  
264 each sub-model ensures that variance that is shared among multiple regressors is not  
265 attributed to each individual predictor and thus, the unique contribution of each connection  
266 can be estimated. More precisely, we estimated  $k=10,000$  regression models using a  
267 randomly selected subset of 5 out of the total of 196 connections. In each iteration, we  
268 recorded which connections were included and we determined the goodness-of-fit using 10-  
269 fold cross-validation (CV). In other words, the fit of behaviour achieved using the random

270 subset of five connections was evaluated on 10% of left-out data, and this was repeated ten  
271 times, so that predictions were never generated from the same participants that the model  
272 was evaluated on (for further details, see Methods). We also ensured that our results were  
273 robust to the choice of model size (i.e. the number of connections in each model, here five;  
274 see **Supplementary Figure 4**). The contribution of each connection was quantified as the  
275 difference in Pearson's correlation coefficient between predicted and true behaviour  
276 (achieved on the out-of-sample data) when the connection was or was not included in the  
277 model ( $r_{\text{Diff}}$ ; **Fig 4A-C**). An uninformative connection would have a contribution around zero,  
278 meaning its inclusion as a predictor does not boost the performance of the model. By  
279 contrast, a predictive connection should improve the correlation between predicted and true  
280 behaviour when it is part of the model (positive difference). Overall, the procedure provided  
281 a robust quantification of the unique contribution of each connection that was unaffected by  
282 existing correlations between predictors (see Methods).

283 To provide an intuition for the raw results, we plotted the contribution of all 196  
284 connections for each of the four behaviours, sorted by ROI (**Fig 4A**) or amygdala nucleus (**Fig**  
285 **4B**). Several interesting patterns emerged from visually inspecting these results. First,  
286 contributions largely differed between the four behaviours (correlations between pairs of  
287 patterns of contributions to the four behaviours, illustrated by the four coloured lines in **Fig**  
288 **4A-B** were all  $<.35$ ). For example, the connection between medial dorsal area p32pr and the  
289 basal nucleus (p32pr-B) strongly contributed to the prediction of life satisfaction (blue;  
290  $r_{\text{Diff}}=.185$ ) but none of the other three behaviours (all  $r_{\text{Diff}}<.06$ ), while multiple connections  
291 with NAc were relevant for sleep (Nac-LaD:  $r_{\text{Diff}}=.179$ ; NAc-LaV=.155) but less for life  
292 satisfaction, negative emotions or anger. Second, some ROIs appeared more broadly relevant  
293 than others for predicting latent behaviours (more non-zero contributions in **Fig 4A**): most  
294 notably, LC and RN\_DR, intriguingly both brainstem nuclei associated with major  
295 neurotransmitter pathways, contributed to multiple behaviours via multiple amygdala nuclei.  
296 By contrast, some regions, most prominently NAc, already mentioned above, seemed  
297 important for a specific behaviour - sleep. Third, examining the contributions sorted by  
298 amygdala nuclei highlighted broad differences between amygdala nuclei. For example, the Ce  
299 nucleus contributed most to predictions of negative emotions and anger while the basal  
300 nucleus was the most critical amygdala nucleus for predicting life satisfaction (**Fig 4B**). We

301 also examined histograms of, first, the contributions (**Fig 4C**) and, second, the underlying raw  
 302 correlation coefficients across the  $k=10,000$  regression models (**Fig 4D**; Supplementary Note  
 303 1).

304

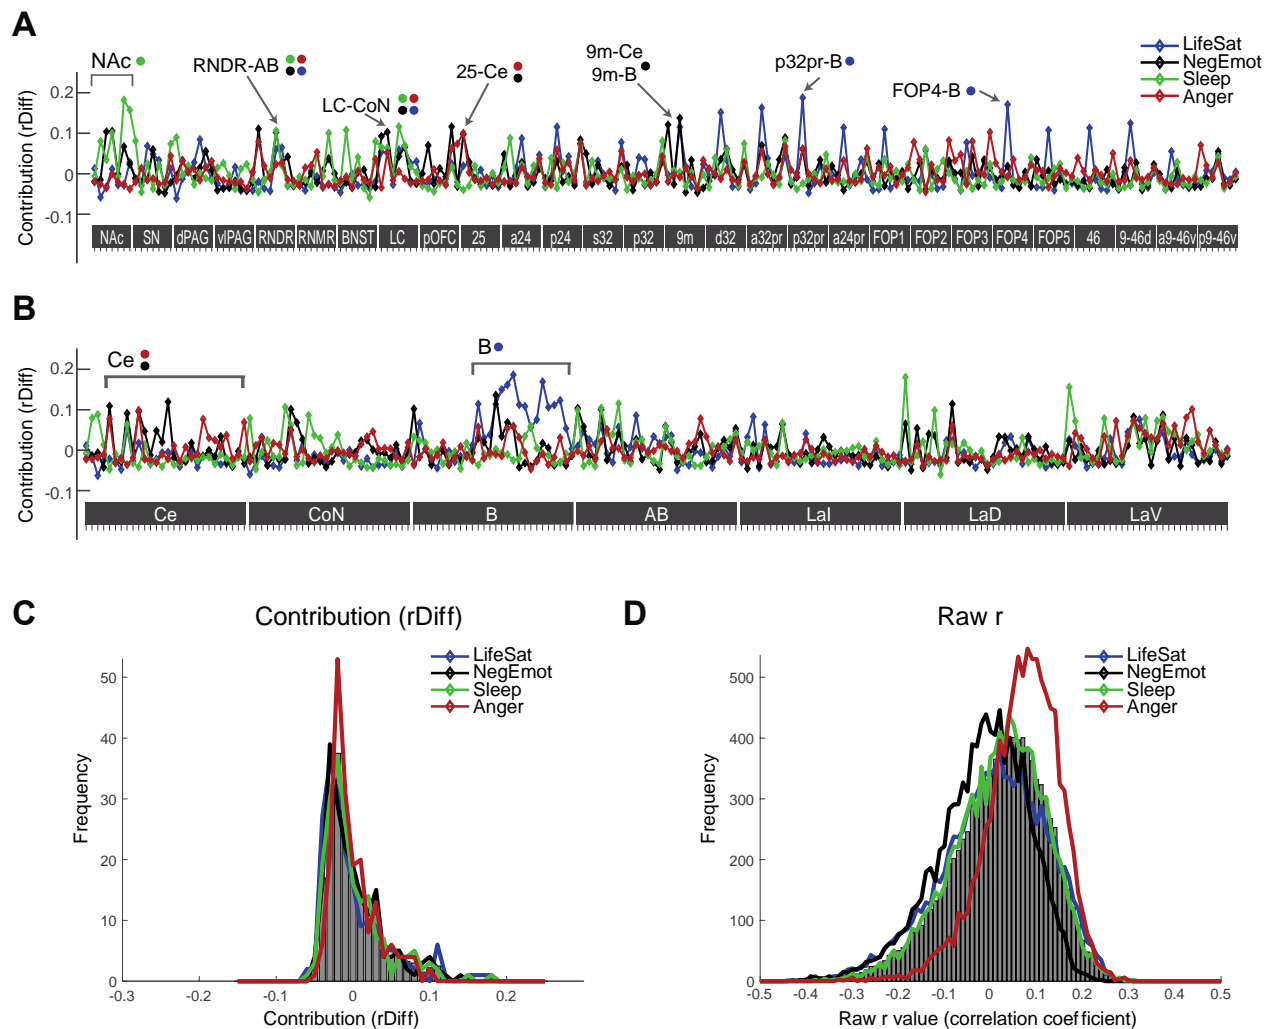

305

306 **Figure 4, The contribution of specific amygdala connections towards**  
 307 **predicting mental well-being, A,** The contribution  $rDiff$  of each connection was  
 308 quantified as the average difference in Pearson's correlation coefficient  $r$  between  
 309 predicted and true latent behaviour when the connection was included in the  
 310 predictive model versus when it was not included. 10,000 predictive models were  
 311 run, each including five randomly chosen connections out of the total pool of 196  
 312 connections between amygdala nuclei and *a priori* ROIs. All predictions were made  
 313 using out-of-sample procedures. Visual inspection of  $rDiff$  values highlights  
 314 anatomical specificity – e.g. the importance of connections with NAC for predicting  
 315 sleep, areas p32pr and FOP4 for predicting life satisfaction and some connections  
 316 predictive of multiple latent behaviours (highlighted with arrows). **B,** Same data as in  
 317 A sorted by amygdala nuclei instead of ROIs on x. This highlights, for example, the  
 318 relevance of multiple connections with the basal amygdala nucleus for predicting life  
 319 satisfaction. **C,** Histogram of contributions  $rDiff$  across the 196 connections. The  
 320 majority of connections are uninformative (around 0). The tail to the right contains  
 321 predictive connections and shows somewhat stronger predictors for life satisfaction  
 322 (blue) and sleep (green) than for negative emotions (black) and anger (red). **D,**  
 323 Histogram of raw Pearson's correlation coefficients  $r$  across the 10,000 model  
 324 iterations.

325 To establish whether contributions of individual connections could be considered meaningful,  
326 we performed multiple statistical tests. The first involved comparison against the  
327 performance of amygdala connections with randomly chosen other regions. The second was  
328 similar but compared our contribution values to those obtained from other subcortical-to-  
329 cortical connections selected at random, instead of amygdala connections. The third  
330 comparison involved amygdala-to-ROI connections again but this time with the whole  
331 amygdala instead of individual nuclei. In a final test, we examined whether binarized  
332 behaviours were decodable using single connections.

333

### 334 *Social & Life Satisfaction*

335 For visualization, we sorted connections by the size of their contribution (**Fig 5A**). We  
336 established significance relative to other brain connections in two ways that both corrected  
337 for the number of tests. We generated a null distribution based on  $n=1000$  different sets of  
338 randomly chosen connections, matched in number, and repeated the above model-fitting  
339 procedure with a reduced  $k=1000$  for computational feasibility. In other words, we ran  
340  $k=1000$  iterations of cross-validated regression models each containing five randomly  
341 selected connections to predict the original behaviours, and we repeated this for  $n=1000$   
342 different sets of 196 randomly drawn connections. In the first test, these randomly drawn  
343 connections were always to/from the amygdala (“amy-to-rnd”). In the second test, nuclei of  
344 the same size as the amygdala nuclei were defined at random subcortical locations and  
345 connections were between these random subcortical seeds and randomly selected cortical  
346 regions (“subc-to-rnd”). Thus, in both cases, our control connections were real brain  
347 connections and comparable to our original analysis in terms of their signal-to-noise. For each  
348 set of random connections, we remembered the contribution achieved by only the top  
349 connection. This procedure accounted for multiple comparisons because the same number  
350 of predictors as in our original analysis (196) was tested in both of the control cases. The  
351 resulting cumulative distribution function was used to establish FWE-corrected p-thresholds  
352 (**Fig 5A**). In the same way, we also generated a distribution based on the contribution  $rDiff$  of  
353 *all* connections in the control hubs, to establish uncorrected p-values (for illustration see  
354 **Supplementary Figure 6A**).



355 This showed that, for social and life satisfaction, one connection was significant when  
356 correcting for 196 comparisons, with two further connections reaching uncorrected  
357 significance at  $p < .001$ . All three connections were between the basal nucleus of the amygdala  
358 and a cortical region: the strongest one with the medial surface of PFC (p32pr with B,  $p_{(FWE, amy-$   
359  $to-rnd)} = .0048$ ;  $p_{(FWE, subc-to-rnd)} = .038$ ), followed by one with frontal operculum (FOP4 with B;  
360  $p_{(unc, amy-to-rnd)} = .0003$ ;  $p_{(unc, subc-to-rnd)} = .0005$ ), and another one with area 32 (a32pr with B,  
361  $p_{(unc, amy-to-rnd)} = .0009$ ;  $p_{(unc, subc-to-rnd)} = .0008$ ; **Fig 5A**). Their contributions were  $rDiff = .185$  for  
362 p32pr with B,  $rDiff = .168$  for FOP4 with B and  $rDiff = .16$  for a32pr with B. Inspection of further  
363 connections (**Fig 5A**) showed that all top connections were with the basal nucleus (B) of the  
364 amygdala and cortical regions, predominantly on the medial surface including in addition to  
365 the above, d32 with B, p24 with B, 9m with B, a24pr with B, but also some with the lateral  
366 surface (9-46d with B and 46 with B). In all cases, a stronger connection between the  
367 amygdala and these areas was related to improved life satisfaction (mean regression  
368 coefficients all positive: e.g.  $\beta = .226$  for p32 and B,  $\beta = .213$  for FOP4 and B, **Fig 6**). Thus, overall,  
369 larger coupling values, and thus in many cases weaker negative coupling (**Fig 2**), between  
370 medial and lateral PFC regions and amygdala related to improved life satisfaction. The  
371 correlation between the latent behaviour predicted using only the best connection (p32pr  
372 with B) and the true latent behaviour is shown for illustration in **Fig 5C** ( $r = .23$ ).

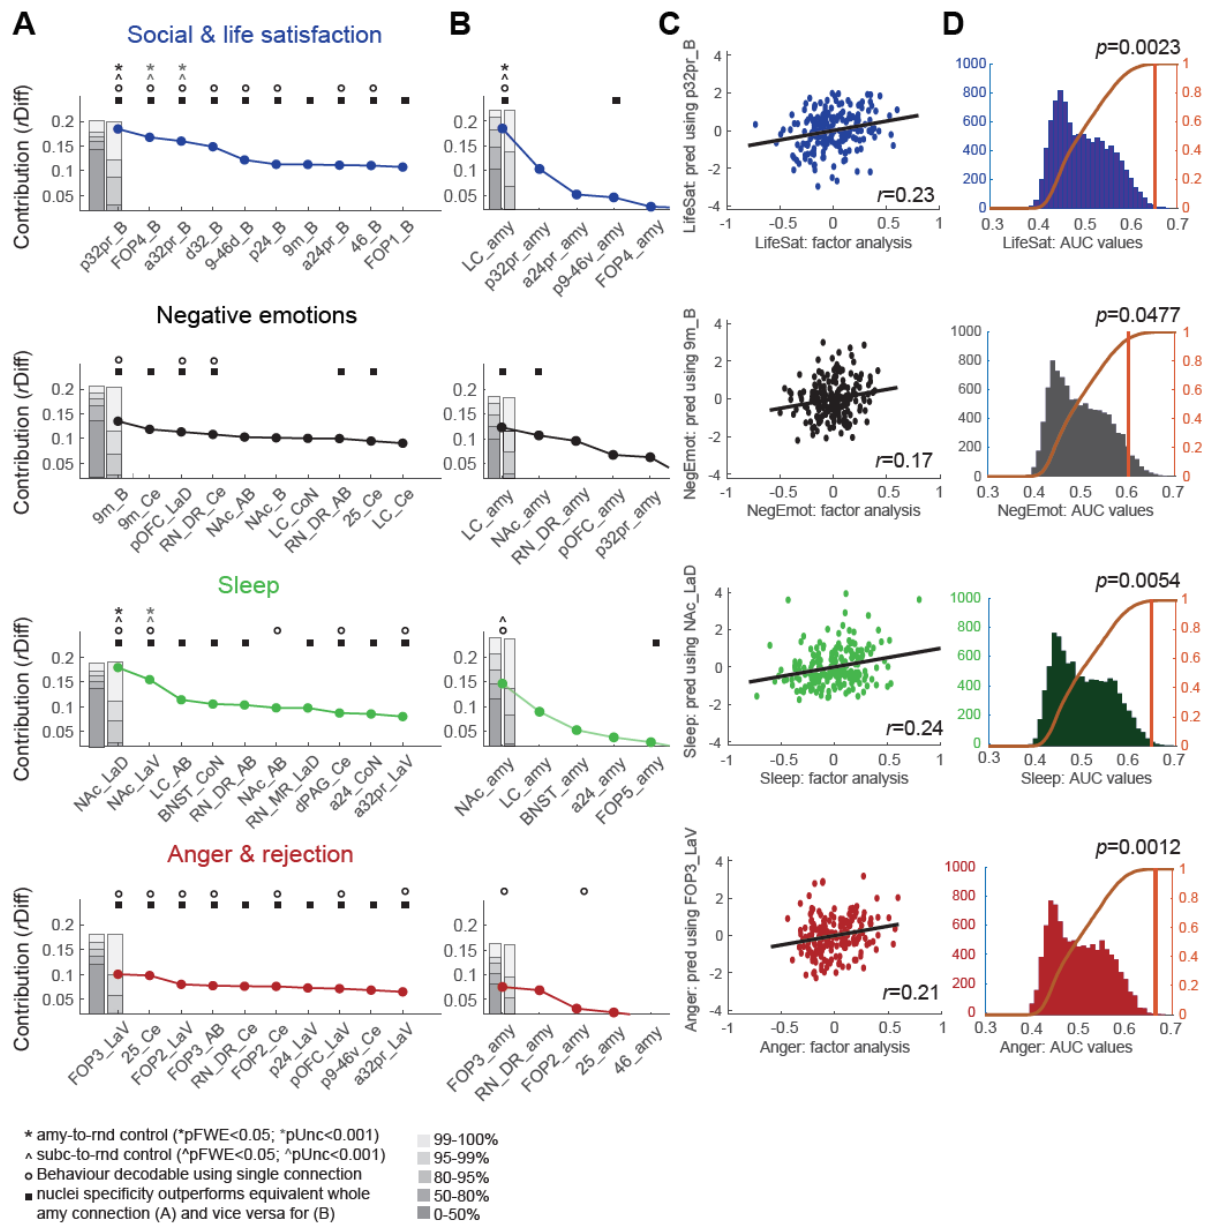

373

374 **Figure 5, Predictive connections differ across latent behaviours.** A, Contribution  
 375 values  $rDiff$  were sorted for each latent behaviour and the top ten connections  
 376 are shown in each case. Significance was determined using multiple procedures. First,  
 377 by considering other amygdala-to-cortical connections (“amy-to-rnd”) and  
 378 considering the contribution of either only the top connection from the same number  
 379 of 196 connections ( $p_{FWE}<0.05$ : black asterisks \*) or all connections ( $p_{unc}<0.001$ : grey  
 380 asterisks ^). The FWE and uncorrected distributions are illustrated in the two grey  
 381 bars on the left, respectively. Using the same procedure, a second control was  
 382 created using random subcortical seeds and their connections to any cortical region  
 383 (“subc-to-rnd”;  $p_{FWE}<0.05$ : black arrow symbols ^;  $p_{unc}<0.001$ : grey arrow symbols ^).  
 384 We also tested whether binarized latent behavioural scores (1=top third, 0=bottom  
 385 third) could be significantly decoded using just a single connection (decodability is  
 386 denoted by a circle). Finally, we tested whether nuclei-specific connections  
 387 outperformed the equivalent connection to the whole amygdala (denoted with a  
 388 square). For predicting social and life satisfaction, connections between the basal  
 389 nucleus of the amygdala and medial and lateral frontal cortex contributed most. By

390 contrast, subcortical connections and primarily agranular cortical regions were  
391 important for predicting negative emotions, and some of these connections were also  
392 important for predicting anger. Sleep was predicted by a quite distinct network  
393 consisting of connections almost exclusively to subcortical regions. **B**, Contribution  
394 values  $rDiff$  for connections with the whole amygdala, rather than specific nuclei, are  
395 sorted according to their  $rDiff$  contribution and the top five connections are shown. **C**,  
396 The true behavioural score obtained from the factor analysis is plotted against the  
397 behavioural score predicted, in each case, using only the top connection. This  
398 illustrates how a single anatomically specific connection can explain a considerable  
399 amount of variance related to a specific marker of mental well-being. **D**, Decodability  
400 is demonstrated for the top connection in each case. The AUC value obtained from  
401 the top connection is denoted by an orange line; AUC values from shuffled  
402 behavioural and connection values are shown in the histogram and were used to  
403 generate p-values.

404 In the next step, we tested whether parcellating the amygdala into sub-nuclei  
405 increased our specificity for predicting mental well-being. We repeated the above regression  
406 procedure for the amygdala as a whole, i.e., using connections of the entire amygdala to the  
407 same set of 28 ROIs (**Fig 5B and Supplementary Figure 5**). Again, p-values were obtained using  
408  $n=1000$  repetitions of randomly sampled connections (each with  $k=1000$  models containing  
409 five connections). We then used the probability of each whole amygdala connection to set  
410 the appropriate alpha level for the corresponding parcellated amygdala connections. In other  
411 words, we compared the effect of connections with specific nuclei of the amygdala against  
412 the same connections with the amygdala as a whole. If the probability of the parcellated  
413 amygdala connection is lower than the threshold set by the whole amygdala, we can infer  
414 that the parcellation increased our sensitivity. This showed that, indeed, the nuclei-specific  
415 connections to ROIs identified above performed better than would be expected from the  
416 connections that reflected connectivity of the same ROI to the entire amygdala. This was true  
417 for connections with the basal nucleus compared to the equivalent connection with the whole  
418 amygdala for all top connections (denoted with a square in **Fig 5A**). Only connections with the  
419 basal nucleus, but none of the other amygdala nuclei, outperformed whole-amygdala  
420 connectivity. Interestingly, the most predictive connection with the whole amygdala, and the  
421 only significant one, was with LC ( $rDiff=.185$ ;  $\beta=-.19$ ,  $p_{(FWE,amy-to-rnd)}=.0405$ ,  $p_{(unc,amy-to-}$   
422  $rnd)}=.0014$ ,  $p_{(FWE,subc-to-rnd)}=.003$ ,  $p_{(unc,subc-to-rnd)}=.0001$ ; **Fig 5B and Supplementary Figure 5**). This  
423 connection's alpha level (i.e. the probability of the same contribution  $rDiff$  to occur by chance  
424 given the control distribution) was smaller than the probability associated with any  
425 connection between LC and individual amygdala nuclei (square in **Fig 5B**). This may seem

426 surprising because in the nuclei-specific analysis, connections with cortical regions seemed  
427 most relevant. But in fact, it suggests that for cortical connections with the amygdala, the  
428 specificity achieved by subdividing the amygdala into nuclei was crucial for predicting life  
429 satisfaction, and all relevant connections were with the basal nucleus. By contrast, the  
430 coupling of individual nuclei with LC was not predictive of life satisfaction (compare to **Fig 4A**),  
431 suggesting LC's interactions with the amygdala are broader and not tied to a specific amygdala  
432 nucleus.

433 In the fourth test, we split life satisfaction scores into thirds and tested whether we  
434 could decode whether a participant was in the top or bottom third of participants based on  
435 the top connections described above (**Fig 5D and Supplementary Figure 6**). Despite the fact  
436 that our investigation focuses on a non-clinical sample that only exhibited limited variation in  
437 the behavioural mental health measures, and despite allowing the decoding algorithm to  
438 exploit information from only a single connection, prediction accuracies were significant for  
439 the top six connections as well as two further connections, including those discussed above  
440 (denoted with circles in **Fig 5A**, see also **Fig 5D and Supplementary Figure 6**; area under the  
441 curve (AUC) values, all  $>.6$  and p-values generated from bootstrapping, all  $p<.05$ ). Thus, using  
442 a single anatomically specific connection, in several cases, we were able to decode if someone  
443 was more or less likely to be socially connected and more generally satisfied in life.

444 **Supplementary Figure 3** shows a map of contributions for social & life satisfaction for  
445 the entire cortex. The colour in each cortical region reflects the contribution ( $rDiff$ , z-scored  
446 across behaviours and connections) of the functional coupling between the amygdala and  
447 that cortical region. In each case it displays the contribution for the amygdala nucleus that  
448 was greatest.

Best predicting connections: fingerprints & sign of influence

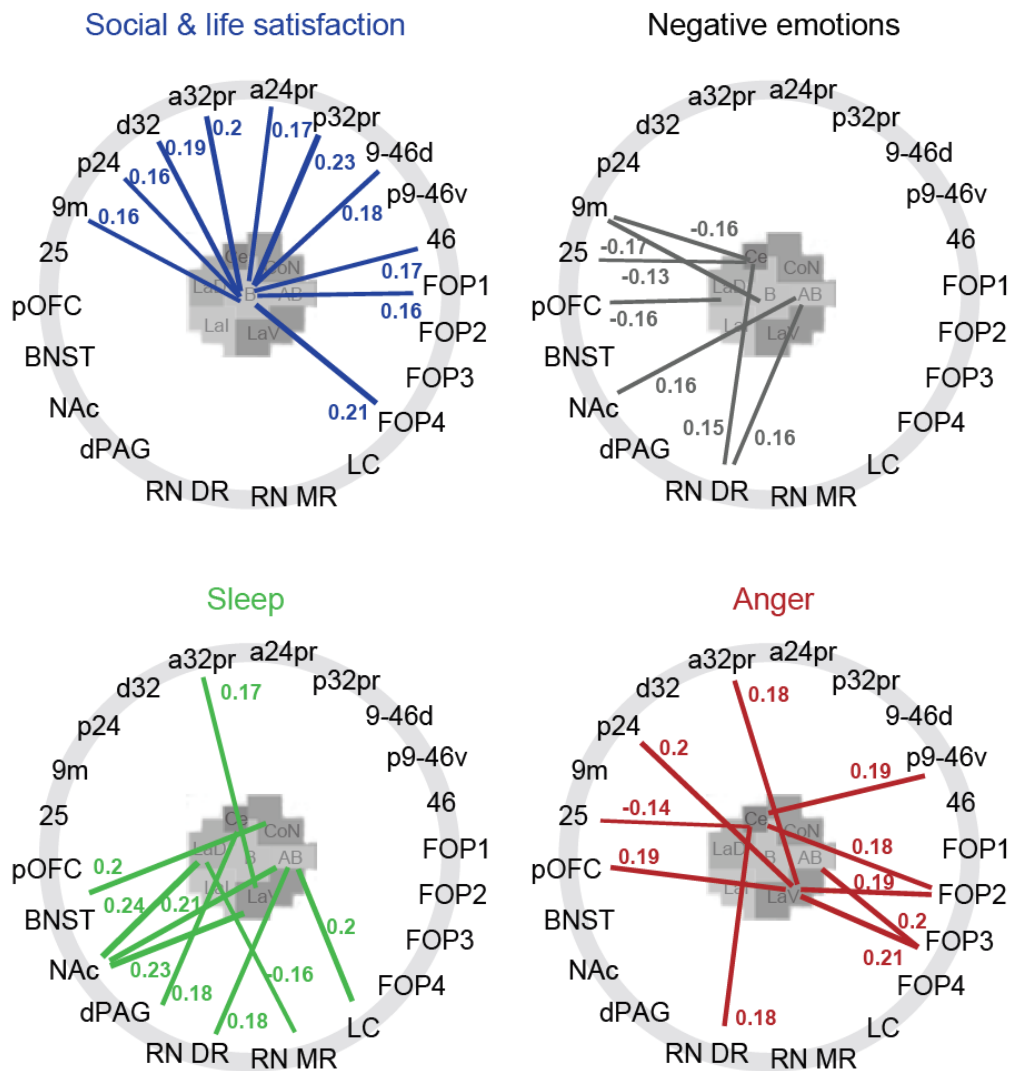

449

450 **Figure 6, Connectional fingerprints highlight differences between markers of**  
 451 **mental well-being**, Fingerprints highlight the differences between the connections  
 452 that significantly contribute to each latent marker of mental well-being. For each  
 453 connection, the sign and size of influence (regression coefficient) is depicted. For  
 454 illustration, fingerprints include the top five connections for each behaviour, and any  
 455 other connections that were significant according to at least one of the four statistical  
 456 criteria outlined in Figure 5.

457

458 *Negative Emotions*

459 The second marker of mental well-being, negative emotions, was subjected to the same  
 460 statistical tests based on randomly chosen connections with the amygdala or random  
 461 subcortical seeds, connections with the whole amygdala and decoding of behavioural scores  
 462 using individual connections. When compared with the distribution of top connections from

463 randomly drawn sets of amygdala (amy-to-rnd) or other subcortical connections (sub-to-  
464 rnd), no connection reached significance (FWE-corrected for 196 connections at  $p < .05$  or  
465 uncorrected significance at  $p < .001$ ). Nevertheless, inspection of the identity of the top  
466 connections showed that apart from area 9m, the connections that contributed most towards  
467 predicting negative emotions were exclusively with subcortical/brainstem regions (RN\_DR,  
468 NAc, LC) and the most posterior aspects of PFC (area 25, pOFC; **Fig 5A**), and were therefore  
469 clearly distinct from those linked to social and life satisfaction. Interestingly, while  
470 connections with all subcortical regions positively related to negative emotions (e.g.  $\beta = .15$   
471 and  $\beta = .155$  for RN\_DR with Ce and RN\_DR with AB,  $\beta = .156$  and  $\beta = .141$  for NAc with AB and  
472 BaL,  $\beta = .148$  for LC with CoN), stronger positive coupling to medial and orbital PFC regions –  
473 which had the strongest influence – was related to reduced chances of experiencing negative  
474 emotions (9m with BaL:  $\beta = -.175$ ; 9m with Ce:  $\beta = -.16$ ; pOFC with LaD:  $\beta = -.158$ , BA25 with Ce:  
475  $\beta = -.129$ ; **Fig 6**). The correlation between predicted and true behaviour using the best  
476 predictor, 9m to B reached  $r = .17$  (**Fig 5C**).

477         Because the comparisons between amygdala nuclei connectivity and other random  
478 selected control connections were not significant after correction for 196 comparisons, the  
479 next step of comparing connections of amygdala nuclei with the adjusted alpha level derived  
480 from connections of the whole amygdala is perhaps best considered as providing a numerical  
481 indication only of whether consideration of individual amygdala nuclei is helpful. Comparison  
482 of nuclei-specific connections with those based on whole amygdala demonstrated that some  
483 predictions were stronger when they were estimated from sub-nuclei, especially those with  
484 cortical regions and RN\_DR. For example, predictions achieved from connections with area  
485 9m were better than expected from the corresponding whole-amygdala connection when  
486 considering the precise nuclei, Ce and B. The same was true for connections between pOFC  
487 with LaD, and area 25 with Ce and RN\_DR with Ce or AB. In all these cases, the specific  
488 connections' contributions to a prediction of negative emotion scores were less likely to occur  
489 by chance than the adjusted alpha level predicted based on the same ROI's coupling with the  
490 whole amygdala (squares in **Fig 5A and Supplementary Fig 5**). On the other hand, for two  
491 subcortical regions, NAc and LC, the adjusted alpha level obtained from the connectivity with  
492 the whole amygdala was smaller than the probability of all specific connections with precise  
493 nuclei, suggesting that negative emotions can be predicted best from NAc or LC connectivity

494 when considering coupling with the whole amygdala (square in **Fig 5B**). However, none of the  
495 connections with the whole amygdala reached significance (LC:  $rDiff=.123$ ;  $\beta=.15$ ,  $p_{(FWE,amy-to-}$   
496  $rnd)=.20$ ,  $p_{(FWE,subc-to-rnd)}=.233$ ; NAc:  $rDiff=.107$ ;  $\beta=.14$ ,  $p_{(FWE,amy-to-rnd)}=.39$ ,  $p_{(FWE,subc-to-rnd)}=.39$ ; **Fig**  
497 **5B and Supplementary Fig 5**).

498 Finally, decoding negative emotion scores in the top and bottom third showed that  
499 three connections provided significant decoding accuracies, 9m with B, pOFC with LaD, and  
500 RN\_DR with Ce (circles in **Fig 5A**, see also **Supplementary Fig 6**; AUCs all  $>.6$ , p-values  $p<.05$ ).

501

## 502 *Sleep*

503 Sleep, like social & life satisfaction, was reliably predicted by a subset of amygdala  
504 connections when compared with other randomly drawn connections. The connection  
505 between NAc and LaV was significant at FWE-corrected levels in both control analyses  
506 ( $rDiff=.179$ ,  $p_{(FWE,amy-to-rnd)}=.0039$ ;  $p_{(FWE,subc-to-rnd)}=.014$ ) and another connection with NAc  
507 reached uncorrected significance at  $p<0.001$  (NAc with LaD:  $rDiff=.155$ ,  $p_{(unc,amy-to-rnd)}=.0008$ ;  
508  $p_{(unc,subc-to-rnd)}=.0003$ ). Thus, sleep was best predicted by subcortical connections. Inspection  
509 of other top connections revealed no cortical predictors in the top eight connections (**Fig 5A**),  
510 but multiple brainstem-amygdala connections that contributed strongly to this behaviour, in  
511 stark contrast to both life satisfaction and negative emotions (**Fig 6**). Both NAc connections  
512 related positively to sleep problems. This suggests sleep problems increased with stronger  
513 positive coupling between amygdala and NAc ( $\beta=.241$ ,  $\beta=.228$ ; **Fig 6**). The best connection,  
514 NAc to LaV predicted sleep problems with  $r=.24$  (**Fig 5C**).

515 When considering the coupling between ROIs and the whole amygdala, NAc and LC  
516 were the strongest predictors of sleep problems, but neither of them was consistently  
517 significant (NAc:  $rDiff=.147$ ,  $\beta=.26$ ,  $p_{(FWE,amy-to-rnd)}=.19$ ,  $p_{(FWE,subc-to-rnd)}=.008$ ; LC:  $rDiff=.090$ ,  
518  $\beta=.21$ ,  $p_{(FWE,amy-to-rnd)}=.80$ ,  $p_{(FWE,subc-to-rnd)}=.198$ ). Comparison of nuclei-specific connections  
519 with the adjusted alpha level obtained from the corresponding whole-amygdala connection  
520 showed for both NAc and RN\_DR (as well as all other top connections apart from NAc with B),  
521 that the specific connections e.g. between NAc and LaD or LaV, or between RN\_DR and AB or  
522 LaD were significant given the adjusted alpha level. Thus, they performed better than  
523 predicted by chance based on the corresponding whole-amygdala connection. Again,

524 considering sub-regions within amygdala made more specific predictions about mental well-  
525 being possible.

526 Decoding analyses revealed significant decoding for three connections between NAC,  
527 with LaV, LaD and AB, but also further connections between dPAG and Ce, and a32pr and LaV  
528 (circles in **Fig 5A**, see also **Supplementary Fig 6**).

529

### 530 *Anger & Rejection*

531 For anger, there was no predictor that performed better, at FWE-corrected levels (corrected  
532 for 196 comparisons), than expected from other randomly chosen amygdala or subcortical  
533 connections (**Fig 5A**). Inspection of the top connections revealed a majority of cortical  
534 connections, and almost exclusively with the Ce and lateral (LaV) amygdala nuclei. As for  
535 negative emotions, cortically, the posterior medial and orbital regions 25 and pOFC were  
536 relevant. However, unlike for any other behaviours, the largest number of top contributing  
537 connections was with the frontal operculum (FOP2 to LaV and Ce, FOP3 to LaV and AB). Four  
538 out of the top six predictors were with frontal operculum. The direction of effects for area 25  
539 to Ce was similar to that seen for negative emotion predictions; increased connectivity  
540 between these regions predicted reduced anger ( $\beta = -.14$ ; **Fig 6**), but stronger frontal opercular  
541 connections with the amygdala predicted increased problems with anger ( $\beta = .207$ ,  $\beta = .188$ ,  
542  $\beta = .202$ ,  $\beta = .183$ ). The correlation between predicted and true behaviour based on the best  
543 predictor, FOP3 to LaV, was  $r = .21$  (**Fig 5C**).

544 The best connections between ROIs and the whole amygdala matched those identified  
545 above in terms of their ROI targets for anger (FOP3:  $r_{Diff} = .076$ ,  $\beta = .17$ ,  $p_{(FWE, amy-to-rnd)} = .56$ ,  
546  $p_{(FWE, subc-to-rnd)} = .33$ ; RN\_DR:  $r_{Diff} = .067$ ,  $\beta = .18$ ,  $p_{(FWE, amy-to-rnd)} = .66$ ,  $p_{(FWE, subc-to-rnd)} = .42$ ).  
547 Interestingly, in all cases, e.g. for connections between area 25 with Ce, FOP2 with LaV or Ce,  
548 and p24 and pOFC with LaV, the probability of nuclei-specific connections was smaller than  
549 predicted from the adjusted alpha level derived from the corresponding whole-amygdala  
550 connection, showing that the specificity provided by the nuclei improved the prediction  
551 (squares in **Fig 5A** and **Supplementary Fig 5**).

552 Decoding binarized anger scores showed that multiple of our top connections allowed  
553 above-chance predictions, most prominently those with FOP regions, namely FOP3 with LaV



554 and AB, and FOP2 with LaV and Ce, but also area 25 with Ce, pOFC with LaV and a32pr with  
555 LaV (all AUC>.6 and p<.05).

## 556 Discussion

557 The need to better describe the biological underpinnings of psychological illness and  
558 dimensional variation linked to psychological illness has long been recognized (for a recent  
559 perspective, see <sup>23</sup>). Here, we used resting-state fMRI, a common *in vivo* tool for estimating  
560 human brain connectivity, but applied a fundamentally different rationale and approach to  
561 the analyses of both neural and behavioural data. Turning first to behavioural data analysis,  
562 rather than stratifying a disease such as depression into several biologically meaningful sub-  
563 groups <sup>39</sup> or classifying people into categories (e.g. patient vs control), we aimed to define  
564 biologically meaningful latent behaviours that capture central aspects of mental health that  
565 exhibit variation even in the sub-clinical range. In the neural analysis we were able to predict  
566 these latent behaviours using a small number of anatomically motivated brain connections.  
567 All of this was done using out-of-sample methods, ensuring robustness and internal  
568 replicability.

569 We identified four latent behaviours which we believe capture distinct aspects of  
570 people's mental health: social/general life satisfaction, negative emotions, sleep problems,  
571 and problems with anger/rejection. Rather than using a summary measure, such as e.g. the  
572 total depression score, we reasoned that because specific brain connections carry specific  
573 combinations of input and output, mappings of behaviour onto precise brain connections are  
574 more likely achieved for functionally meaningful behavioural units <sup>23,40</sup>. We obtained latent  
575 behavioural markers using a factor analysis <sup>41</sup>. Alternatively, computational modelling  
576 approaches are sometimes used to identify precise measures of behaviour <sup>42,42-44</sup>. In order  
577 to link the latent behavioural markers to precise brain connections, we focussed on the  
578 amygdala. First, we demonstrated that it was possible to identify *in vivo* seven component  
579 amygdala subregions that corresponded to amygdala nuclei. They reliably varied in their  
580 connectivity in comparison to one another, but they were topological arranged in a similar  
581 manner in both hemispheres. Second, we demonstrated that patterns of functional  
582 connectivity – correlations in the BOLD signals – between each amygdala nucleus and 28  
583 cortical, forebrain subcortical, and brainstem regions were approximately as predicted from  
584 anatomical tracer studies. We were then able to proceed to the final stage of the study and  
585 show that variation in functional connectivity between specific amygdala nuclei and these  
586 other regions were predictive of variation in the four latent behaviours.

587           Three aspects of our data underlined the importance of the functional connectivity of  
588 specific amygdala nuclei. First, several of the best predictive connections associated with each  
589 latent behaviour explained enough variance to allow prediction of whether someone was in  
590 the top or bottom third of the given behaviour. The resulting decoding accuracies achieved  
591 using a single connection (**Fig 5A,D** and **Supplementary Fig 6**) were not too dissimilar from  
592 accuracies reported when predictions were based on large networks<sup>1-5</sup> and we would expect  
593 them to be even larger in a clinical population that includes the extremes of the behavioural  
594 distribution. In the context of neuroimaging, our sample size of 200 participants can be  
595 considered fairly large<sup>23</sup>. We therefore believe the reported effect sizes are considerable and  
596 meaningful. Despite the importance of large network approaches, an advantage of the  
597 current approach is that it provides specific regions and connections as targets for therapeutic  
598 intervention involving a range of approaches such as pharmacological, neurostimulation,  
599 neurofeedback, or cognitive interventions. Second, variations in six or more of the  
600 connections were associated with significantly better predictions of the latent behaviours  
601 than was possible when just the connectivity of the amygdala as a whole was considered.  
602 Finally, in a third test, we established that the connection's contributions were significant  
603 even when the null distribution that they were compared against was from the same  
604 amygdala nuclei but to a random set of 28 brain regions, or from same-size random  
605 subcortical nuclei to a random set of 28 brain regions. Indeed, for two of our latent  
606 behaviours, two to three connections between specific amygdala nuclei and other brain  
607 regions were significant predictors of the extent to which the behaviour was present, over  
608 and above what would be achieved using randomly chosen connections. Importantly,  
609 predictive connections largely differed between the four latent measures of mental well-  
610 being (see fingerprints in **Fig 6**) and only few connections were shared.

611           We had a strong anatomical prior not only on the importance of the amygdala but the  
612 importance of the amygdala's interactions with specific cortical, forebrain subcortical,  
613 midbrain, and brainstem regions thanks to the large body of studies in animal models that  
614 has examined these circuits<sup>10-13,20</sup>. As a result of careful fMRI data preprocessing we were  
615 able to examine activity not just within medial temporal lobe but even in specific brainstem  
616 regions and relate the coupling patterns to variation in our indices of mental health. We  
617 believe there are other prime anatomical hubs such as ventromedial and subgenual frontal

618 areas that would be worth investigating with a similar approach. It is unlikely that a single  
619 region or network is sufficient to fully predict all aspects of someone's mental well-being  
620 <sup>7,15,20,39,45,46</sup>. Nevertheless, we believe it is important to recognize that individual and  
621 identifiable connections may have particular importance. This is a view taken more commonly  
622 when considering targeted interventions in mental health, such as for example using invasive  
623 deep brain stimulation (DBS) which has in some cases led to remarkable improvements in  
624 mood <sup>45,47</sup>, but may work particularly well when the right connections between subcortical  
625 and cortical regions are targeted <sup>48</sup>. Similarly, other non-invasive stimulation approaches such  
626 as repetitive transcranial magnetic stimulation (rTMS) are more likely to be successful when  
627 targeting specific circuits (e.g. subcallosal connectivity; <sup>49</sup>). Such interventions could become  
628 more feasible with advances in non-invasive ultrasound methods <sup>50-52</sup>. So, while our findings  
629 are not of immediate clinical relevance, they suggest interventions targeted at particular  
630 nuclei might benefit someone predominantly suffering from sleep problems while targeting  
631 others might benefit someone who experiences strong negative emotions. We note one  
632 potential limitation, namely that we relied on a large volume of data – approximately one  
633 hour of resting-state scans in each participant – from highly optimized pulse sequences, which  
634 may not be available regularly in patients.

635 Our parcellation of the amygdala into seven nuclei strikingly resembled previous  
636 amygdala investigations but which were possible only *post mortem* <sup>29-31</sup>. Saygin et al., for  
637 instance, scanned at a resolution of 100-150um at 7T and identified nine nuclei which  
638 resembled in their size, position and transitions patterns the seven nuclei identified here.  
639 Previous parcellations based on *in vivo* data have identified fewer subdivisions <sup>24-27</sup> but the  
640 borders identified in those studies still resembled a subset of the borders we identified here  
641 thereby underlining consistency in results. The finer grained parcellation we obtained  
642 reflected improved image quality and preprocessing pipelines that better controlled for  
643 physiological noise. We show that detailed amygdala parcellation is important for achieving  
644 the behavioural prediction accuracies reported here (**Fig 5**). This is unsurprising given known  
645 anatomical and functional differences between amygdala nuclei <sup>19</sup>.

646 The amygdala networks identified for the different latent behaviours seem plausible  
647 in the context of previous work. For example, social and life satisfaction highlighted  
648 connections between the amygdala and regions primarily located in medial and lateral frontal

649 cortex, more precisely areas p32pr, a32pr and d32 as well as areas FOP4 and 9-46d<sup>34</sup>, with  
650 less pronounced negative coupling between these areas and the basal amygdala nucleus  
651 predicting improved life satisfaction. These areas in or close to the dorsal anterior cingulate  
652 cortex (dACC) as well as frontal opercular/insula regions have been linked to aspects of  
653 behavioural change and adaption<sup>53,54</sup>, abilities compromised in anxiety<sup>55</sup>, and are important  
654 for arbitrating between exploration and exploitation<sup>56,57</sup>, a process changed in depression<sup>58</sup>.  
655 Even though there is probably little direct coupling between dlPFC and amygdala, dlPFC is a  
656 stimulation target in depression, and alters amygdala threat responses<sup>33</sup>. It thus seems  
657 unsurprising that connections between these medial and lateral frontal regions and the  
658 amygdala might contribute to overall social and life satisfaction.

659 It is worth noting that, because rs-fMRI was used as a proxy for anatomical  
660 connectivity here, the patterns in activity coupling we identify do not necessarily correspond  
661 to monosynaptic connections. While monosynaptic connections might dominate in **Figure 2B**  
662 which illustrates, the strongest activity correlations of the amygdala nuclei, the relations we  
663 identified between activity coupling and mental health indices (**Figures 4-6**) may rely on a  
664 multi-component connection pathway or may involve connections between two amygdala  
665 nuclei.

666 The associations between negative emotions, our second latent behaviour, and  
667 amygdala connectivity can also be understood in the context of the functions of these areas  
668 even if, once again, some of the critical pathways may be indirect. Amygdala connections with  
669 areas 9m, pOFC, 25 and subcortical structures (LC, RN\_DR, NAc) seem plausible. Weaker  
670 coupling between area 25 and the central nucleus, between pOFC and the adjacent LaD  
671 nucleus, and between 9m and Ce and B nuclei are related to more pronounced negative  
672 emotions. Although pOFC has received little attention, bipolar patients demonstrate reduced  
673 grey matter in pOFC<sup>59</sup> and both pOFC and amygdala have been linked to the most basic  
674 aspects of stimulus-reward association learning<sup>60</sup>. Area 25 has been linked to autonomic and  
675 affective regulation and, just like the amygdala, exhibits abnormal metabolism in depressed  
676 patients<sup>15,20</sup>. Stimulation of this region or its interconnections may reduce depression<sup>45,48</sup>.  
677 The fourth latent measure of mental well-being we identified, anger and rejection, was also  
678 linked to areas 25 and pOFC, in addition to other frontal opercular regions that have recently

679 been linked to the balancing of the most recent outcomes with the wider, more long-term  
680 experience of reward<sup>61,62</sup>.

681 In contrast to cortical regions, stronger rather than weaker subcortical connectivity  
682 with amygdala nuclei predicted negative emotions. This suggests that diminished cortical-  
683 amygdala interaction is accompanied with increased amygdala interaction with subcortical  
684 areas linked to the origins of widely branching neuromodulatory systems such as serotonin  
685 and noradrenaline (RN\_DR, LC) and key targets of other systems such as dopamine (NAc).  
686 Noradrenaline mediates stress and stress-related responses and stress-induced dysregulation  
687 of the NA system may contribute to the pathogenesis of depression<sup>63</sup>. Increasing NA can also  
688 be effective as an antidepressant treatment. LC occupied a somewhat unique position  
689 because it was the only region which was somewhat predictive of three out of four latent  
690 behaviours when considering coupling with the whole amygdala (**Fig 5B and Supplementary**  
691 **Fig 5**). This suggests that a more global coupling pattern between LC and amygdala may help  
692 regulate mood in a way that impacts multiple of our latent measures of well-being. Indeed,  
693 LC-amygdala coupling has been linked to the retrieval of emotional memories<sup>64</sup>. Taken  
694 together, LC-amygdala connections seem central for mediating problems related to negative  
695 emotions that impact mental health.

696 The third latent measure of mental well-being captured sleep problems and was  
697 linked to a distinctly different connectional fingerprint (**Fig 6**). Unlike the other three  
698 behaviours, it comprised only subcortical connections between lateral amygdala nuclei and  
699 NAc. The NAc is an important projection target of VTA dopamine neurons, and dysfunction of  
700 the striatum has been associated with sleep disturbances, with neurons in NAc core  
701 particularly important for controlling slow-wave sleep<sup>65,66</sup>.

702 In summary, our work suggests that strong anatomical priors derived from animal  
703 studies, in combination with neuroimaging data of sufficient anatomical detail, make it  
704 possible to forge links between dimensions of mental health and specific neural circuits.  
705 Crucially this also depends on the identification of mental health behaviour clusters which,  
706 even if in the subclinical range, are naturally emerging functional groupings that are more  
707 likely to map onto the brain's functional organization.

## 708 Materials & Methods

709

### 710 *Participants*

711 Data and ethics were provided by the Human Connectome Project (HCP), WU-Minn  
712 Consortium (Principal Investigators: David Van Essen and Kamil Ugurbil; 1U54MH091657)  
713 funded by the 16 NIH Institutes and Centers that support the NIH Blueprint for Neuroscience  
714 Research; and by the McDonnell Center for Systems Neuroscience at Washington University.  
715 Two hundred HCP subjects (n=200; mean age  $29 \pm .26$ ; age range 22-36; 108 females, 92  
716 males) were pseudo-randomly chosen from the full HCP data set  
717 (<https://www.humanconnectome.org/>). Working on a subset of all 1206 HCP participants was  
718 necessary because one key aspect of the pre-processing was to correct rs-fMRI data for  
719 physiological noise, which particularly affects the key regions of this study such as the  
720 amygdala and brainstem. However, the quality of acquired physiological variables varies  
721 substantially across HCP participants. We therefore inspected the variance in physiological  
722 recordings of those participants' in whom physiological measures had been acquired both  
723 visually and by plotting summary measures such as the total variance over time and only  
724 considered participants with sufficient signal in both cardiac and respiratory measurements.  
725 Participants were further selected to achieve a spread in their mental well-being scores.  
726 Specifically, we tried to achieve high variance in the total DSM score (ASR\_Totp\_T) which was  
727 not used in any further analyses (resulting mean total DSM score: 47.94, variance: 103.83;  
728 mean of all 1206 HCP participants: 47.41; variance: 80.61).

729

### 730 *Data and minimal pre-processing*

731 Four resting state runs were acquired on a Siemens Skyra 3T scanner using custom pulse  
732 sequences (for details see <sup>67-69</sup>). In brief, resting-state runs lasted 14.4 minutes, had a TR of  
733 720ms, TE of 33ms, isotropic resolution of 2mm, 72 slices, and a multiband factor of 8  
734 resulting in 1200 timepoints. Two runs were acquired using right-left phase encoding and two  
735 using left-right phase-encoding. Spin-echo images and T1-weighted images were acquired for  
736 distortion correction and registration (for more details see <sup>70</sup>). We used all four runs of each  
737 subject and downloaded the minimally pre-processed HCP data which is described in detail in  
738 <sup>28</sup>. In brief, these data are distortion-corrected, temporally filtered, projected on to a surface

739 reconstruction obtained from the T1-weighted image while maintaining subcortical voxels  
740 (cifti format), and minimally smoothed. Registration across participants was achieved using  
741 multi-modal areal-feature-based surface registration (MSMall) <sup>34</sup>.

742

#### 743 *Additional pre-processing*

744 Because noise caused by physiological artefacts (e.g. breathing, pulse) is particularly  
745 pronounced in brainstem and temporal lobe structures, all key areas for this study, we  
746 performed corrections for physiological noise in the data. Removal of artefacts caused by  
747 physiological signals is not currently incorporated in standard HCP pipelines. We used the  
748 PNM toolbox (<https://fsl.fmrib.ox.ac.uk/fsl/fslwiki/PNM>; <sup>71</sup>) to generate physiological  
749 regressors (a total of 33 regressors comprised of: cosine and sine of basic cardiac and  
750 respiratory regressors modelled with an order of 4, and thus 16 regressors; multiplicative  
751 cardiac and respiratory terms  $\cos(c+r)$ ,  $\sin(c+r)$ ,  $\cos(c-r)$ ,  $\sin(c-r)$ , each modelled using an order  
752 of two, and thus again 16 regressors; plus respiration volume per time (RVT)<sup>71</sup>). In addition to  
753 physiological regressors, we constructed 24 motion regressors from the six motion regressors  
754 provided (in the HCP data release, these are stored in Movement\_Regressors.txt) (e.g., <sup>70</sup>):  
755 the six original regressors, their derivatives, and the square of the resulting twelve regressors.  
756 We also used independent component analysis (ICA)-denoising as provided with the  
757 'fixextended' HCP dataset (melodix\_mix and Noise.txt). The motion, physiological and ICA  
758 noise regressors were normalized, high-pass filtered and detrended to mimic the pre-  
759 processing performed on the data. Then, motion and physiological confounds were  
760 aggressively regressed out of the data and ICA components (thus entirely removing any  
761 variance explained by physiological or motion parameters), and the noise ICA components  
762 were subsequently removed from the data using a soft regression (thus removing only the  
763 variance unique to the ICA noise components).

764 The data were demeaned, the variance of the noise in the data normalized (as in <sup>34</sup>)  
765 and the four runs of each participant were concatenated. Additional smoothing was applied  
766 to the surface only (sigma=5mm; no additional smoothing was applied to subcortical  
767 structures, including the amygdala). This yielded the fully pre-processed data for each of the  
768 200 participants which contained a total of 4800 time points from the combined 1200 time  
769 points of the four resting-state runs.



770

### 771 *Group dense connectome*

772 A group average timeseries was generated from the 200 individual data sets using the  
773 algorithm 'MIGP' <sup>72</sup>. MIGP is a computationally tractable method to approximate the group  
774 average time series using group-level PCA. The two parameters specifying (a) the number of  
775 data-points kept on-line during the iterative computation of the average and (b) the cut-off  
776 describing the number of principal components kept at the end were both set to 4800,  
777 corresponding to the number of data points in each individual's file. A dense connectome was  
778 created from the average time series using the function *cifti-correlation* (using Fisher's z).  
779 Ringing artefacts were corrected using *Wishart RollOff* <sup>34</sup>.

780

### 781 *Clustering*

782 The full dense connectome was restricted to contain the connectivity of voxel's in both  
783 amygdalae to the rest of the brain (647 voxels x 91282 brain-ordinates). Connectivity values  
784 were transformed into absolute values (i.e., unsigned 'strength' of correlation) to enable both  
785 positive and negative coupling patterns to inform the clustering solution (FSLnets ignores  
786 negative values in its hierarchical clustering routine). A similarity matrix was computed based  
787 on this absolute connectivity using Pearson's correlation coefficient (FSLnets function  
788 *nets\_netmats*, part of FSLnets: <https://fsl.fmrib.ox.ac.uk/fsl/fslwiki/FSLNets>). In other words,  
789 the similarity matrix captured, for any pair of amygdala voxels, the similarity of their  
790 connectivity profile to the rest of the brain. The similarity matrix was fed into a hierarchical  
791 clustering algorithm (function *nets\_hierarchy.m* part of FSLnets). We thus obtained a  
792 clustering of the amygdalae based on the similarity of different amygdala voxel's connectivity  
793 to the rest of the brain.

794 To evaluate the number of clusters, or in other words, the appropriate depth of the  
795 hierarchical clustering tree, we aimed for a good balance between simplicity and detail, as  
796 well as anatomical plausibility. One simple heuristic to assess anatomical plausibility was to  
797 prefer solutions with corresponding clusters across left and right hemispheres. Another focus  
798 was on detail: for instance, it has been suggested that the two largest amygdala nuclei, basal  
799 and lateral nuclei, can be further split into several subdivisions <sup>31</sup>. We were also keen to  
800 identify the rather small central nucleus in both hemispheres, given its importance for

801 connecting the amygdala to brainstem regions. The central nucleus split off at depth 10 and  
802 12 of the hierarchical clustering algorithm in the left and right hemisphere respectively, at  
803 which point both hemispheres contained 7 clusters (AB and CoN were still connected across  
804 hemispheres, so there were five uniquely left clusters, five uniquely right clusters and two  
805 clusters that contained both hemispheres, and thus depth 12). This clustering solution was  
806 also symmetrical across hemispheres. At the next depths from 13-15, AB split between L and  
807 R hemispheres and the ventral part of the lateral nucleus split into two halves first in the right  
808 hemisphere and then in the left hemisphere. This was more detail than we would have  
809 anticipated or required for interpretation of further analyses. Throughout the results, we  
810 therefore focussed on the depth 12 cluster solution, which when merging corresponding  
811 clusters in both hemispheres yielded seven final clusters (**Figs 1B and 2A**). Other clustering  
812 depths are shown in **Supplementary Fig 1**.

813

#### 814 *Naming of clusters*

815 The labelling of clusters was largely based on the Atlas of the Human Brain by <sup>31</sup> and a post-  
816 mortem parcellation at 7T with 100-150um resolution <sup>29</sup>. The most dorsal, posterior and  
817 lateral nucleus (dark blue in **Figs 1B and 2A**) which was also the smallest in size (62 voxels  
818 across both hemispheres) perfectly matched in its size and position the central amygdaloid  
819 nucleus and was therefore labelled **Ce**. Judging from its position and size, it contained both  
820 medial and lateral divisions of the central nucleus' <sup>31</sup>. However, it is less clear whether it also  
821 contained the medial amygdaloid nucleus. The medial amygdaloid nucleus might have been  
822 part of this 'Ce' cluster or the adjacent cluster (middle blue in **Figs 1B and 2A**) which was  
823 positioned in a dorsal, posterior and medial location where the cortical amygdaloid nuclei are  
824 located (e.g. PCo=posterior cortical; ACoV and ACoD = anterior cortical, ventral & dorsal parts  
825 <sup>31</sup>; sometimes referred to as CAT = cortico-amygdaloid transition area e.g., <sup>29</sup>). We therefore  
826 labelled this adjacent cluster **CoN**, as an agglomeration of the cortical nuclei of the amygdala.  
827 It contained altogether 133 voxels across left and right hemispheres, and possibly comprised  
828 cortical nuclei as well as the medial nucleus. Ventral and anterior to the Ce and CoN nuclei, in  
829 a medial position within the amygdala (light blue in **Figs 1B and 2A**), we identified a portion  
830 of the basal amygdala which very likely contained Mai et al.'s ventral and dorsal basomedial  
831 (BMVM and BMDM), and probably also its basolateral paralaminar and intermediate

832 subdivision (BLPL and BLI), and thus the majority of basomedial and basolateral aspects of the  
833 basal nucleus. We therefore refer to it simply as the basal nucleus **B**. It contained 74 voxels  
834 and was adjacent to a slightly more medial subdivision of the basal nucleus which we refer to  
835 as auxiliary basal (**AB**, green in **Figs 1B and 2A**) and which contained 104 voxels. This cluster  
836 AB, based on its size and location, would have contained the ventromedial part of the  
837 basolateral nucleus in <sup>31</sup> (BLVM) and closely corresponded to what Saygin and colleagues <sup>29</sup>  
838 describe as AB as well. The remaining three clusters made up the lateral nucleus of the  
839 amygdala, namely its dorsal, intermediate and ventral portion (**LaD**, **LaI**, **LaV**, respectively, in  
840 red, yellow and dark red in **Figs 1B and 2A**). These clusters contained 84, 86 and 104 voxels,  
841 respectively.

842

#### 843 *ROI selection*

844 We had a number of a priori regions of interest which were informed by prior work, including  
845 anatomical work using tracers in macaque monkeys as well as work in humans with mental  
846 health disorders. All our ROIs are illustrated in Fig **2C** and will be motivated one by one.

847 We included aspects of dorsolateral prefrontal cortex (dlPFC) despite it not having  
848 strong monosynaptic connections with the amygdala in monkeys, because of work involving  
849 neurostimulation to dlPFC, most commonly repetitive transcranial magnetic stimulation  
850 (rTMS), which has been shown to alleviate symptoms of mental health disorders, particularly  
851 depression <sup>73,74</sup> and because it has been implicated in the regulation of amygdala responses  
852 to threat <sup>33,75</sup>. The location of stimulation over dlPFC can be variable across studies but is most  
853 common over areas 9/46 and 46 and particularly effective when strong connectivity with  
854 dlPFC and area 25 is observed <sup>76</sup>. We therefore included all sub-clusters of areas 46 and 9/46  
855 reported in HCP's multi-model parcellation version 1.0 <sup>34</sup> which included 46 (316 vertices), 9-  
856 46d (379 vertices), a9-46v (147 vertices), and p9-46v (214 vertices).

857 On the medial and orbital surface, amygdala connectivity gradually changes along an  
858 anterior-posterior axis, with strongest connectivity posteriorly closest to the corpus callosum  
859 <sup>19,77</sup>. This also mimics the transition between agranular and dysgranular/granular cortex, and  
860 unimodal to transmodal connectivity <sup>78,79</sup>. We included all agranular regions in the medial and  
861 orbital prefrontal cortex; all of the likely homologues of these areas have strong  
862 monosynaptic connectivity with the amygdala in monkeys. This included areas 32, 25, 24 and

863 the most posterior part of OFC. We also included granular area 9m, adjacent do area 32 in  
864 medial frontal cortex, and frontal operculum, which has also been highlighted in tracer  
865 studies for its connections with the amygdala. As above, we took the parcels obtained from  
866 HCP's multi-model parcellation version 1.0 <sup>34</sup> which are labelled areas 25 (54 vertices), a24  
867 (89 vertices), p24 (66 vertices), a24pr (75 vertices), s32 (55 vertices), p32 (122 vertices), d32  
868 (147 vertices), a32pr (163 vertices), p32pr (190 vertices), 9m (408 vertices) and pOFC (83  
869 vertices). Frontal operculum contains FOP1-FOP5 (with 61, 101, 83, 240 and 193 voxels,  
870 respectively). Apart from their strong connectivity with the amygdala many of these regions  
871 have indeed been implicated in mood disorders and social cognition. For example, PET work  
872 shows abnormal metabolism in subgenual PFC, including area 25, ventral 24 and possibly 32  
873 <sup>15</sup>, deep brain stimulation in sub-genual regions or their adjacent fibre passages can alleviate  
874 symptoms of depression <sup>45,80,81</sup> and negative biases in decision-making can be induced by  
875 stimulating pregenual cortex (rostral area 24 and dorsal area 32; <sup>82</sup>). In addition, several  
876 studies have also highlighted the importance of peri-/pregenual cortex in social cognition <sup>83,84</sup>.  
877 In summary, we included four cortical regions on the lateral, 10 cortical regions on the medial,  
878 one cortical region on the orbital surface, and five frontal opercular regions, and thus a total  
879 of 20 cortical ROIs.

880 Subcortically, our major focus was on the key nuclei associated with different  
881 neurotransmitter systems because of their importance for mental well-being. We included  
882 the substantia nigra (SN), which contains the majority of dopaminergic neurons and the  
883 nucleus accumbens (NAc), an area receiving strong dopaminergic innervation <sup>85</sup>. DA has been  
884 implicated in mental health disorders; for example, Parkinson's disease, which is  
885 characterized by a loss of DA neurons in SN, leads to depression in a large percentage of  
886 patients (~35%; <sup>86</sup>). But DA also plays a key role in reward-learning and sleep regulation.  
887 Striatal dysfunction has, for instance, been associated with sleep disturbances and a subset  
888 of NAc core neurons was found to regulate slow-wave sleep <sup>65,66</sup>. The SN mask was taken from  
889 the NITRC Atlas of the basal ganglia <sup>87</sup> and contained 134 voxels. The NAc was taken from the  
890 Harvard Subcortical Atlas and contained 188 voxels.

891 The bed nucleus of the stria terminalis (BNST) was included because of its role in  
892 mediating the long-term effects of anxiety and responses to stress <sup>88</sup>. It is also sometimes  
893 considered part of the extended amygdala. The BNST mask was obtained from <sup>89</sup>.

894 Two regions with opposing functionality within the periaqueductal grey (PAG) were  
895 included because of their importance in regulating autonomic arousal: ventrolateral PAG  
896 (vIPAG) which mediates rest- and digest-related behaviour and dorsal PAG (dPAG) which  
897 mediates fight and flight responses. The masks for these regions were taken from <sup>90</sup>. The  
898 dPAG was the summation of Faull et al.'s dorsomedial (dm) and dorsolateral (dl) aspects of  
899 PAG; vIPAG contained 43 voxels and dPAG 45 voxels.

900 The role of serotonin and of selective serotonin reuptake inhibitors (SSRI) in the  
901 pathology and treatment of mental health disorders is well known. The raphe nuclei are the  
902 most important source of serotonin in the brain. Masks for dorsal and median raphe nuclei  
903 were taken from the Harvard Ascending Arousal Network Atlas <sup>91</sup>. The dorsal raphe nucleus  
904 (RN\_DR) contained 23 voxels, and the median raphe nucleus (RN\_MR) contained 8 voxels.  
905 Finally, locus coeruleus (LC), the main site of noradrenaline production was defined based on  
906 <sup>92</sup> and contained 20 voxels.

907 Probabilistic masks were binarized first, including all voxels with probability  $>.25$ , in  
908 other words, voxels that had a larger than 25% chance of being within the given region (NAc,  
909 SN). Binary files and all masks we received in binary format (BNST, PAG, LC, RN) were  
910 subsampled to 2mm, and binarized again using any voxels  $>.25$  in subsampled space. The  
911 exceptions were NAc where thresholding at  $.25$  would have yielded an unusually large ROI,  
912 so a threshold of  $>.75$  was applied in the second step; for the raphe nuclei, thresholds were  
913 adjusted manually to maximise anatomical plausibility ( $>.6$  and  $>.72$  for dorsal and median,  
914 respectively).

915 Thus, we included a total of eight subcortical and brainstem regions, which are shown  
916 in **Fig 2C**.

917

918

### 919 *Selection of behavioural scores*

920 Instead of using psychiatric scores (e.g. the total depression score), our goal was to define  
921 underlying variation in emotional and social wellbeing in the normal range but, in particular,  
922 those aspects of emotional and social wellbeing that might be affected in anxious or  
923 depressed individuals. We went through all restricted and unrestricted behavioural markers

924 acquired as part of HCP and selected those that related to mental well-being. We included 33  
925 behaviours composed of

926 (1) Measures from the NIH Toolbox Emotion Battery ([www.nihtoolbox.org](http://www.nihtoolbox.org))<sup>93,94</sup>(total:  
927 17); each item was administered on a 5-point scale with options ranging from “not  
928 at all” to “very much”. In all cases a-d below, scores <40 are considered low and  
929 scores >60 are considered high.

930 a. Six measures from the Negative Affect toolbox (Anger Affect: obtained  
931 using computer-adaptive testing (CAT), Anger Hostility: obtained from a  
932 questionnaire with 5 items, Anger Aggression: also 5 items, Fear Affect:  
933 CAT, Fear Somatic: 6 items, Sadness: CAT);

934 b. Three measures from the Psychological Well-Being toolbox (Life  
935 Satisfaction, Mean Purpose, Positive Affect) – all obtained using CAT

936 c. Six measures from the Social Relationships toolbox (Friendship, Loneliness,  
937 Perceived Hostility, Perceived Rejection, Emotional Support, Instrumental  
938 Support); loneliness obtained from a questionnaire containing 5 items, all  
939 others from questionnaires containing 8 items.

940 d. Two measures from the Stress and Self Efficacy toolbox (Perceived Stress:  
941 10 items, Self-Efficacy: CAT)

942 (2) Measures from the Pittsburgh Sleep Questionnaire<sup>95</sup> (total 9) composed of  
943 minutes to fall asleep (past month); hours of sleep per night (past month); sleep  
944 trouble: can't go to sleep within 30 minutes; sleep trouble: wake-up in middle of  
945 night or early morning; sleep trouble: had bad dreams; overall sleep quality; how  
946 often taken sleep medicine; how often trouble staying awake during the day; how  
947 often trouble keeping up enthusiasm during the day. All of these were rated on a  
948 scale from 0-9.

949 (3) Measures from the five-factor model<sup>96</sup> a) neuroticism; b)  
950 extroversion/introversion; c) agreeableness; d) openness; and e)  
951 conscientiousness<sup>97</sup>. HCP data collection administered the 60-item version of the  
952 Costa and McRae Neuroticism/Extroversion/Openness Five Factor Inventory  
953 (NEO-FFI), which has good reliability and validity<sup>97</sup>. This measure was obtained as  
954 part of the Penn Computerized Cognitive Battery<sup>98</sup>.

955 (4) Measures from the Penn Emotion Recognition Test, again obtained as part of the  
956 Penn Emotion Recognition Test. During this test, participants are presented with  
957 40 faces and need to identify the emotion of the face from the five options happy,  
958 sad, angry, scared and no feeling. There are eight faces in each category. We  
959 included a) the number of Correct Anger Identifications (ER40ANG) ranging from  
960 0-8 and b) the number of Correct Fear Identifications (ER40FEAR) ranging from 0-  
961 8.

962

### 963 *Factor analysis and creation of latent behaviours*

964 We conducted a factor analysis on these 33 behavioural markers (z-scored) using  
965 Matlab's function 'factoran', with a 'promax' rotation. A Scree test<sup>99</sup> based on an initial  
966 sample of 100 participants suggested four factors (nFactors package in R with function nScree  
967 <sup>100</sup>), all of which seemed interpretable upon inspection of their weights. We therefore fixed  
968 the number of factors to four. Importantly, the same four factors replicated in our full dataset  
969 of 200 participants and inspection of a potential fifth factor showed lack of interpretability  
970 and would have introduced a high correlation between two of the factors ( $r=.5$ ; compared to  
971 highest correlation in our set of four:  $.35$ ). Moreover, and most importantly, our four factors  
972 also replicated on the full set of 1206 HCP participants: the correlation between the factor  
973 weights for a factor analysis based on 200 versus 1206 participants was  $.95$ ,  $.93$ ,  $.97$ ,  $.9$  for  
974 the four factors.

975 The weights obtained for the four factors were multiplied onto the original 33  
976 behavioural markers (z-scored) to construct four summary or latent behaviours per  
977 participant. These were summarized and are referred to throughout as 'social and life  
978 satisfaction', 'negative emotions', 'sleep' and 'anger & rejection'.

979

### 980 *Regression analyses to identify the most predictive connections*

981 A regression approach was used to identify the most predictive connections, separately for  
982 each of the four latent behaviours. The data to be predicted,  $\mathbf{y}$ , was in each case a  $200 \times 1$   
983 vector describing the true latent behaviour for each participant. The matrix of potential  
984 predictors  $\mathbf{X}$  was a matrix with  $200 \times 196$  resting-state functional coupling (FC) values for each  
985 participant and the 196 connections described above (7 amygdala nuclei  $\times$  28 ROIs). Outlier

986 participants were conservatively rejected based on their individual FC values if more than 10%  
987 of their FC values across all connections deviated more than 3.5 standard deviations from the  
988 mean across participants. This identified five participants as outliers and all analyses were  
989 performed on the remaining 195. Next, confounds were regressed out of the data as in <sup>101</sup>.  
990 Confounds included (1) acquisition reconstruction software version; (2) summary statistic  
991 quantifying average head motion; (3) weight; (4) height; (5) blood pressure – systolic; (6)  
992 blood pressure – diastolic; (7) haemoglobin A1C in blood; (8) cube-root of total brain volume;  
993 (9) cube-root of total intracranial volume. As described in detail in <sup>101</sup>, in addition to these  
994 nine confounds, eight additional confounds included the demeaned and squared measures  
995 2-9 to account for potential nonlinear confound effects. A total of 17 confounds were thus  
996 regressed out of the matrix X. Both y and X were z-scored.

997 For generating the plots in **Fig 4**, we estimated k=10,000 regression models using 10-  
998 fold cross-validation. For each model, we selected a random subset of five out of the total of  
999 196 potential connections as predictor variables. We also generated a new cross-validation  
1000 (CV) set in each iteration, with the additional constraint of keeping siblings together – i.e. all  
1001 members of the same family were allocated together to the training set or to the test set. In  
1002 each CV-fold, the goodness-of-fit was determined as the correlation (Pearson's *r*) between  
1003 true latent behaviour and the out-of-sample model-predicted behaviour obtained using the  
1004 subset of five connections. For each model iteration, we saved the contributing connections  
1005 and the average *r* across the 10 folds. The overall contribution of each connection (**Fig 4A-C**)  
1006 was then determined across all 10,000 iterations as the average difference in *r* value between  
1007 all iterations that did and all iterations that did not include the connection in the model. The  
1008 distribution of these contribution values is shown across connections (**Fig 4C**), and we also  
1009 report the histogram of raw *r* values from all 10,000 model iterations (**Fig 4D**).

1010 It is worth highlighting some of the features of this procedure that explain its  
1011 suitability for analysing our data. Including all connections in one large regression model was  
1012 not feasible due to the large number of regressors and existing correlations between them.  
1013 Our approach allowed us to identify two similar connections (e.g. NAc-LaV and NAc-LaD for  
1014 sleep) as important because these two would only seldom be included simultaneously, by  
1015 chance, in a regression model with five randomly selected connections. Using our approach,  
1016 a smaller number of connections, e.g. considering each connection individually or only



1017 including two at a time in each sub-model, would over-estimate some contributions because  
1018 shared features are assigned to each. On the contrary, larger sub-models with e.g. 20 or 30  
1019 connections would underestimate the predictors' contributions. Importantly, we verified that  
1020 our main conclusions were robust to choices of model size ranging from 2 to 5 to 10  
1021 connections (**Supplementary Figure 4**).

1022 Fitting a large number of  $k=10,000$  regression models allowed robust estimates of  
1023 each connection's contribution because with large enough  $k$ , contribution estimates converge  
1024 (**Supplementary Fig 6D**). If we had estimated only  $k=200$  models, for example, we would have,  
1025 on average, estimated each connection's contribution five times ( $200/196*5$ ) and an average  
1026 of five numbers would have been our final contribution estimate  $rDiff$ . By fitting 10,000  
1027 models, we estimated each connection  $10,000/196 * 5 = \sim 255$  times, leading to a more robust  
1028 estimate. At  $k=10,000$  iterations, the estimated contribution  $rDiff$  changed very little with  
1029 slight increases or decreases in the number of iterations: going from  $k=8,000$  to  $k=10,000$   
1030 iterations on average changed  $rDiff$  by .0058, going from  $k=10,000$  to  $k=15,000$  by .0055,  
1031 indicating convergence (**Supplementary Fig 6D**). There was no risk of overfitting because all  
1032 predictions were done out-of-sample.

1033 To test whether contributions of individual connections were better than predicted  
1034 by chance, given the level of noise present in brain connections with the amygdala and given  
1035 our number of connections, we generated two versions of a null distribution (**Supplementary**  
1036 **Fig 6A**) by instead predicting the vector  $\mathbf{y}$  containing the latent behaviours using  $n=1,000$   
1037 random sets of connections between all amygdala nuclei and 28 ROIs. In each of the  $n=1,000$   
1038 iterations, we included all 196 connections between the seven amygdala nuclei and 28  
1039 randomly chosen ROIs ( $28*7=196$ ; "amy-to-rnd"), thus matching the total number of  
1040 connections with our main analysis of interest. We allowed connections from the original  
1041 amygdala nuclei to *any* cortical region except our set of *a priori* ROIs. For each of the 1,000  
1042 iterations with random connections, we ran 1,000 sub-models with different sets of five  
1043 connections and different CV-partitions, as above. We then extracted the distribution of the  
1044 top connection to obtain p-values corrected for multiple comparisons, and of all connections  
1045 to obtain uncorrected p-values (for illustration see **Supplementary Fig 6A**). To do this, we  
1046 calculated the cumulative distribution function of the corrected and uncorrected  
1047 distributions, which was used to generate the p-thresholds corresponding to FWE-corrected

1048  $p < .05$ , and uncorrected  $p < 0.001$ , respectively (denoted by black and grey asterisks in **Fig 5A**,  
1049 respectively). For the illustration of the strongest connections in the fingerprints in **Fig 6**, we  
1050 calculated the average regression coefficients for each connection to show the strength and  
1051 sign of their influence on predicting the latent behaviour (shown as numbers on the  
1052 connections in **Fig 6**). Scatterplots were produced for visual illustration of the strength of  
1053 predictive power achieved with only the top connection of each latent behaviour (**Fig 5C**).

1054 The above distributions were generated based on connections between the amygdala  
1055 and randomly chosen other regions. As a result, they were likely conservative because we  
1056 believe the amygdala itself carries importance for predicting variation in mental health and  
1057 there might be other relevant connections with regions apart from the ones we specified *a*  
1058 *priori*. In a second control, we tested whether contributions of our amygdala-to-ROI  
1059 connections were superior to those obtained from connections with other subcortical  
1060 regions. In each of  $n=1000$  iterations, we chose seven random seeds of the same size as the  
1061 amygdala nuclei, placed anywhere in HCP's subcortical volume (containing NAc, brainstem,  
1062 caudate, cerebellum, diencephalon, hippocampus, pallidum, putamen & thalamus). By using  
1063 a subcortical seed and real brain connections, we matched the level of noise present in  
1064 subcortical structures to our original analysis. For each of these  $n=1000$  random subcortical  
1065 seeds, we randomly chose 28 ROIs from anywhere in cortex, including our *a priori* ROIs ("subc-  
1066 to-rnd"). This resulted in  $n=1000$  hubs which closely matched the structure of our brain  
1067 connections of interest. For each one, we performed out-of-sample estimations of the  
1068 contribution of each connection, as above. Again, we generated null distributions by  
1069 remembering the contribution  $rDiff$  of the top connection, or all connections, resulting in  
1070 FWE-corrected and uncorrected  $p$ -values, respectively.

1071

#### 1072 *Controlling for amygdala parcellation and ROI selection*

1073 To show that parcellating the amygdala yielded improvements in predictive power, we also  
1074 repeated the regression procedure with only the connections from our ROIs to the entire  
1075 amygdala instead of all individual nuclei (a total of 28 possible predictors). All figure panels  
1076 related to connections with the whole amygdala, instead of its seven distinct nuclei, were  
1077 generated using identical methods (**Fig 5B and Supplementary Fig 5**). Again, five connections  
1078 went into each model and 1,000 iterations of models were generated using different CV-

1079 partitions. We generated separate null distributions for this analysis as before ( $k=1000$ ,  
1080  $n=1000$ ) and the  $p$ -thresholds for whole amygdala connections (**Fig 5B**) are relative to these  
1081 new distributions which were generated based on (a) only the whole-amygdala to randomly  
1082 selected ROI connections (“amy-to-rnd”) or (b) random subcortical (“fake amygdala”) seeds to  
1083 randomly selected ROI connections (“subc-to-rnd”). We also used the probability of each of  
1084 our whole-amygdala to ROI connections, obtained from these uncorrected distributions, to  
1085 generate adjusted alpha values against which we compared the corresponding nuclei-specific  
1086 connections to the same ROI. This test established if parcellating the amygdala into nuclei  
1087 helped us gain specificity in our predictions. For example, if the probability of the connection  
1088 from p32pr to the whole amygdala, given the uncorrected amy-to-rnd distribution, is  $p=.02$ ,  
1089 we consider the parcellation to be a meaningful improvement if any of the nuclei-specific  
1090 connections to p32pr are less than this adjusted alpha of .02. In this example, this was the  
1091 case for the connection of p32pr with B (square symbol in **Fig 5A**;  $p<.001$  given the nuclei-  
1092 specific uncorrected distribution, and thus smaller than alpha of 0.02) but not any other  
1093 nuclei-connections with p32pr. The same rationale can be used for both uncorrected control  
1094 distributions (amy-to-rnd and subc-to-rnd) but the conclusions from both tests are virtually  
1095 identical and therefore only reported for the former distribution (amy-to-rnd).

1096

### 1097 *Decoding latent behaviours*

1098 For decoding analyses, outlier rejection and regressing out of confounds was applied to the  
1099 connectivity values as described above. For each latent behaviour, decoding was restricted to  
1100 participants with scores in the top and bottom third and the behaviour was binarized. The  
1101 predictors used by the decoder were the connections established as the top ten connections  
1102 in each case above. We used a linear support vector machine (SVM, Matlab’s function  
1103 fitlinear). The SVM was again trained on 90% and tested on the left-out 10% of values, with  
1104 CV-folds respecting family structures, and this was repeated for all 10 folds. Prediction  
1105 accuracy was computed as the area under the curve (AUC). P-values were derived from a  
1106 histogram derived from bootstrapping (10,000 iterations) using behavioural and connectivity  
1107 values that were shuffled between participants and respected family structure.

## 1108 Acknowledgements

1109 Data were provided by the Human Connectome Project, WU-Minn Consortium (Principal  
1110 Investigators: David Van Essen and Kamil Ugurbil; 1U54MH091657) funded by the 16 NIH  
1111 Institutes and Centers that support the NIH Blueprint for Neuroscience Research; and by the  
1112 McDonnell Center for Systems Neuroscience at Washington University. MCKF was funded by  
1113 a Sir Henry Wellcome Fellowship (103184/Z/13/Z), MFSR was funded by an MRC grant  
1114 (MR/P024955/1) and a Wellcome Senior Investigator Award (WT100973AIA).

## 1115 Author contributions

1116 MCKF and MFSR designed the study, MCKF, DEAJ and MFSR conceived analyses, MCKF and  
1117 DEAJ wrote analysis code, LV, YT and SS gave analysis advice, and all authors wrote the  
1118 manuscript.

## 1119 Competing Interests statement

1120 None

## 1121 Data availability statement

1122 All data used in the present study are available for download from the Human Connectome  
1123 Project ([www.humanconnectome.org](http://www.humanconnectome.org)). Users must apply for access and agree to the HCP data  
1124 use terms (for details see [https://www.humanconnectome.org/study/hcp-young-adult/data-](https://www.humanconnectome.org/study/hcp-young-adult/data-use-terms)  
1125 [use-terms](https://www.humanconnectome.org/study/hcp-young-adult/data-use-terms)). Here we used both Open Access and Restricted data.

## 1126 References

- 1127 1. Bijsterbosch, J. D. *et al.* Stratification of MDD and GAD patients by resting state brain  
1128 connectivity predicts cognitive bias. *NeuroImage Clin.* **19**, 425–433 (2018).
- 1129 2. Reggente, N. *et al.* Multivariate resting-state functional connectivity predicts response  
1130 to cognitive behavioral therapy in obsessive–compulsive disorder. *Proc. Natl. Acad. Sci.*  
1131 **115**, 2222–2227 (2018).
- 1132 3. Sikora, M. *et al.* Salience Network Functional Connectivity Predicts Placebo Effects in  
1133 Major Depression. *Biol. Psychiatry Cogn. Neurosci. Neuroimaging* **1**, 68–76 (2016).
- 1134 4. Takagi, Y. *et al.* A Neural Marker of Obsessive-Compulsive Disorder from Whole-  
1135 Brain Functional Connectivity. *Sci. Rep.* **7**, 1–10 (2017).
- 1136 5. Zeng, L.-L. *et al.* Identifying major depression using whole-brain functional  
1137 connectivity: a multivariate pattern analysis. *Brain J. Neurol.* **135**, 1498–1507 (2012).
- 1138 6. Aggleton, J. P. The contribution of the amygdala to normal and abnormal emotional  
1139 states. *Trends Neurosci.* **16**, 328–333 (1993).
- 1140 7. Drevets, W. C. Neuroimaging abnormalities in the amygdala in mood disorders. *Ann. N.*  
1141 *Y. Acad. Sci.* **985**, 420–444 (2003).
- 1142 8. Etkin, A. *et al.* Individual differences in trait anxiety predict the response of the  
1143 basolateral amygdala to unconsciously processed fearful faces. *Neuron* **44**, 1043–1055  
1144 (2004).
- 1145 9. Kennedy, D. P. & Adolphs, R. The social brain in psychiatric and neurological  
1146 disorders. *Trends Cogn. Sci.* **16**, 559–572 (2012).
- 1147 10. Murray, E. A., Wise, S. P. & Drevets, W. C. Localization of dysfunction in major  
1148 depressive disorder: prefrontal cortex and amygdala. *Biol. Psychiatry* **69**, e43-54 (2011).
- 1149 11. Phelps, E. A. & LeDoux, J. E. Contributions of the amygdala to emotion processing:  
1150 from animal models to human behavior. *Neuron* **48**, 175–187 (2005).

- 1151 12. Adolphs, R. The biology of fear. *Curr. Biol. CB* **23**, R79-93 (2013).
- 1152 13. Bernardi, S. & Salzman, C. D. The contribution of nonhuman primate research to the  
1153 understanding of emotion and cognition and its clinical relevance. *Proc. Natl. Acad. Sci.*  
1154 **116**, 26305–26312 (2019).
- 1155 14. Dal Monte, O., Costa, V. D., Noble, P. L., Murray, E. A. & Averbeck, B. B. Amygdala  
1156 lesions in rhesus macaques decrease attention to threat. *Nat. Commun.* **6**, 10161 (2015).
- 1157 15. Drevets, W. C. *et al.* Subgenual prefrontal cortex abnormalities in mood disorders.  
1158 *Nature* **386**, 824–827 (1997).
- 1159 16. Chang, S. W. C. *et al.* Neural mechanisms of social decision-making in the primate  
1160 amygdala. *Proc. Natl. Acad. Sci. U. S. A.* **112**, 16012–16017 (2015).
- 1161 17. Murray, E. A. & Wise, S. P. Interactions between orbital prefrontal cortex and  
1162 amygdala: advanced cognition, learned responses and instinctive behaviors. *Curr. Opin.*  
1163 *Neurobiol.* **20**, 212–220 (2010).
- 1164 18. Taubert, J. *et al.* Amygdala lesions eliminate viewing preferences for faces in rhesus  
1165 monkeys. *Proc. Natl. Acad. Sci.* **115**, 8043–8048 (2018).
- 1166 19. Amaral, D. G., Price, J. L., Pitkanen, A. & Carmichael, S. T. Anatomical organization  
1167 of the primate amygdaloid complex. in *The Amygdala: Neurobiological Aspects of*  
1168 *Emotion, Memory, and Mental Dysfunction* 1–66 (New York: Wiley-Liss, 1992).
- 1169 20. Rudebeck, P. H., Rich, E. L. & Mayberg, H. S. From bed to bench side: Reverse  
1170 translation to optimize neuromodulation for mood disorders. *Proc. Natl. Acad. Sci.* **116**,  
1171 26288–26296 (2019).
- 1172 21. Zangemeister, L., Grabenhorst, F. & Schultz, W. Neural Basis for Economic Saving  
1173 Strategies in Human Amygdala-Prefrontal Reward Circuits. *Curr. Biol. CB* **26**, 3004–  
1174 3013 (2016).

- 1175 22. Van Essen, D. C. *et al.* The WU-Minn Human Connectome Project: an overview.  
1176 *NeuroImage* **80**, 62–79 (2013).
- 1177 23. Insel, T. *et al.* Research domain criteria (RDoC): toward a new classification framework  
1178 for research on mental disorders. *Am. J. Psychiatry* **167**, 748–751 (2010).
- 1179 24. Abivardi, A. & Bach, D. R. Deconstructing white matter connectivity of human  
1180 amygdala nuclei with thalamus and cortex subdivisions in vivo. *Hum. Brain Mapp.* **38**,  
1181 3927–3940 (2017).
- 1182 25. Bzdok, D., Laird, A. R., Zilles, K., Fox, P. T. & Eickhoff, S. B. An investigation of the  
1183 structural, connectional, and functional subspecialization in the human amygdala. *Hum.*  
1184 *Brain Mapp.* **34**, 3247–3266 (2013).
- 1185 26. Kerestes, R., Chase, H. W., Phillips, M. L., Ladouceur, C. D. & Eickhoff, S. B.  
1186 Multimodal evaluation of the amygdala’s functional connectivity. *NeuroImage* **148**,  
1187 219–229 (2017).
- 1188 27. Solano-Castiella, E. *et al.* Parcellation of human amygdala in vivo using ultra high field  
1189 structural MRI. *NeuroImage* **58**, 741–748 (2011).
- 1190 28. Smith, S. M. *et al.* Resting-state fMRI in the Human Connectome Project. *NeuroImage*  
1191 **80**, 144–168 (2013).
- 1192 29. Saygin, Z. M. *et al.* High-resolution magnetic resonance imaging reveals nuclei of the  
1193 human amygdala: manual segmentation to automatic atlas. *NeuroImage* **155**, 370–382  
1194 (2017).
- 1195 30. Ding, S.-L. *et al.* Comprehensive cellular-resolution atlas of the adult human brain. *J.*  
1196 *Comp. Neurol.* **524**, 3127–3481 (2016).
- 1197 31. Mai, J. K., Majtanik, M. & Paxinos, G. *Atlas of the Human Brain*. (Academic Press,  
1198 2015).

- 1199 32. Neubert, F.-X., Mars, R. B., Sallet, J. & Rushworth, M. F. S. Connectivity reveals  
1200 relationship of brain areas for reward-guided learning and decision making in human  
1201 and monkey frontal cortex. *Proc. Natl. Acad. Sci. U. S. A.* **112**, E2695-2704 (2015).
- 1202 33. Ironside, M. *et al.* Effect of Prefrontal Cortex Stimulation on Regulation of Amygdala  
1203 Response to Threat in Individuals With Trait Anxiety: A Randomized Clinical Trial.  
1204 *JAMA Psychiatry* (2018) doi:10.1001/jamapsychiatry.2018.2172.
- 1205 34. Glasser, M. F. *et al.* A multi-modal parcellation of human cerebral cortex. *Nature* **536**,  
1206 171–178 (2016).
- 1207 35. O'Reilly, J. X. *et al.* Causal effect of disconnection lesions on interhemispheric  
1208 functional connectivity in rhesus monkeys. *Proc. Natl. Acad. Sci. U. S. A.* **110**, 13982–  
1209 13987 (2013).
- 1210 36. Carmichael, S. T. & Price, J. L. Sensory and premotor connections of the orbital and  
1211 medial prefrontal cortex of macaque monkeys. *J. Comp. Neurol.* **363**, 642–664 (1995).
- 1212 37. Freedman, L. J., Insel, T. R. & Smith, Y. Subcortical projections of area 25 (subgenual  
1213 cortex) of the macaque monkey. *J. Comp. Neurol.* **421**, 172–188 (2000).
- 1214 38. Kurth-Nelson, Z., Barnes, G., Sejdinovic, D., Dolan, R. & Dayan, P. Temporal structure  
1215 in associative retrieval. *eLife* **4**, (2015).
- 1216 39. Drysdale, A. T. *et al.* Resting-state connectivity biomarkers define neurophysiological  
1217 subtypes of depression. *Nat. Med.* **23**, 28–38 (2017).
- 1218 40. Haro, J. M. *et al.* ROAMER: roadmap for mental health research in Europe. *Int. J.*  
1219 *Methods Psychiatr. Res.* **23 Suppl 1**, 1–14 (2014).
- 1220 41. Gillan, C. M., Kosinski, M., Whelan, R., Phelps, E. A. & Daw, N. D. Characterizing a  
1221 psychiatric symptom dimension related to deficits in goal-directed control. *eLife* **5**,  
1222 e11305 (2016).



- 1223 42. Huys, Q. J. M., Moutoussis, M. & Williams, J. Are computational models of any use to  
1224 psychiatry? *Neural Netw. Off. J. Int. Neural Netw. Soc.* **24**, 544–551 (2011).
- 1225 43. Huys, Q. J. M. *et al.* Bonsai trees in your head: how the pavlovian system sculpts goal-  
1226 directed choices by pruning decision trees. *PLoS Comput. Biol.* **8**, e1002410 (2012).
- 1227 44. Scholl, J. & Klein-Flügge, M. Understanding psychiatric disorder by capturing  
1228 ecologically relevant features of learning and decision-making. *Behav. Brain Res.* **355**,  
1229 56–75 (2018).
- 1230 45. Mayberg, H. S. *et al.* Deep Brain Stimulation for Treatment-Resistant Depression.  
1231 *Neuron* **45**, 651–660 (2005).
- 1232 46. Williams, L. M. Defining biotypes for depression and anxiety based on large-scale  
1233 circuit dysfunction: a theoretical review of the evidence and future directions for clinical  
1234 translation. *Depress. Anxiety* **34**, 9–24 (2017).
- 1235 47. Holtzheimer, P. E. *et al.* Subcallosal cingulate deep brain stimulation for treatment-  
1236 resistant depression: a multisite, randomised, sham-controlled trial. *Lancet Psychiatry* **4**,  
1237 839–849 (2017).
- 1238 48. Johansen-Berg, H. *et al.* Anatomical connectivity of the subgenual cingulate region  
1239 targeted with deep brain stimulation for treatment-resistant depression. *Cereb. Cortex N.*  
1240 *Y. N 1991* **18**, 1374–1383 (2008).
- 1241 49. Dichter, G. S., Gibbs, D. & Smoski, M. J. A systematic review of relations between  
1242 resting-state functional-MRI and treatment response in major depressive disorder. *J.*  
1243 *Affect. Disord.* **172**, 8–17 (2015).
- 1244 50. Folloni, D. *et al.* Manipulation of Subcortical and Deep Cortical Activity in the Primate  
1245 Brain Using Transcranial Focused Ultrasound Stimulation. *Neuron* **101**, 1109-1116.e5  
1246 (2019).

- 1247 51. Fouragnan, E. F. *et al.* The macaque anterior cingulate cortex translates counterfactual  
1248 choice value into actual behavioral change. *Nat. Neurosci.* **22**, 797–808 (2019).
- 1249 52. Verhagen, L. *et al.* Offline impact of transcranial focused ultrasound on cortical  
1250 activation in primates. *eLife* **8**, (2019).
- 1251 53. Meder, D. *et al.* Simultaneous representation of a spectrum of dynamically changing  
1252 value estimates during decision making. *Nat. Commun.* **8**, 1942 (2017).
- 1253 54. Wittmann, M. K. *et al.* Predictive decision making driven by multiple time-linked  
1254 reward representations in the anterior cingulate cortex. *Nat. Commun.* **7**, 12327 (2016).
- 1255 55. Browning, M., Behrens, T. E., Jocham, G., O’Reilly, J. X. & Bishop, S. J. Anxious  
1256 individuals have difficulty learning the causal statistics of aversive environments. *Nat.*  
1257 *Neurosci.* **18**, 590–596 (2015).
- 1258 56. Kolling, N., Behrens, T., Wittmann, M. & Rushworth, M. Multiple signals in anterior  
1259 cingulate cortex. *Curr. Opin. Neurobiol.* **37**, 36–43 (2016).
- 1260 57. Kolling, N., Scholl, J., Chekroud, A., Trier, H. A. & Rushworth, M. F. S. Propection,  
1261 Perseverance, and Insight in Sequential Behavior. *Neuron* **99**, 1069-1082.e7 (2018).
- 1262 58. Blanco, N. J., Otto, A. R., Maddox, W. T., Beevers, C. G. & Love, B. C. The influence  
1263 of depression symptoms on exploratory decision-making. *Cognition* **129**, 563–568  
1264 (2013).
- 1265 59. Almeida, J. R. C. *et al.* Reduced gray matter volume in ventral prefrontal cortex but not  
1266 amygdala in bipolar disorder: significant effects of gender and trait anxiety. *Psychiatry*  
1267 *Res.* **171**, 54–68 (2009).
- 1268 60. Klein-Flügge, M. C., Wittmann, M. K., Shpektor, A., Jensen, D. E. A. & Rushworth, M.  
1269 F. S. Multiple associative structures created by reinforcement and incidental statistical  
1270 learning mechanisms. *Nat. Commun.* **10**, 1–15 (2019).

- 1271 61. Sallet, J. *et al.* Behavioral flexibility is associated with changes in structure and function  
1272 distributed across a frontal cortical network in macaques. *bioRxiv* 603530 (2019)  
1273 doi:10.1101/603530.
- 1274 62. Wittmann, M. *et al.* Global reward state affects learning, the raphe nucleus, and anterior  
1275 insula in monkeys. *Nature Comm* (Under second review).
- 1276 63. Schildkraut, J. J. The catecholamine hypothesis of affective disorders: a review of  
1277 supporting evidence. *Am. J. Psychiatry* **122**, 509–522 (1965).
- 1278 64. Sara, S. J. The locus coeruleus and noradrenergic modulation of cognition. *Nat. Rev.*  
1279 *Neurosci.* **10**, 211–223 (2009).
- 1280 65. Brown, R. E., Basheer, R., McKenna, J. T., Strecker, R. E. & McCarley, R. W. Control  
1281 of Sleep and Wakefulness. *Physiol. Rev.* **92**, 1087–1187 (2012).
- 1282 66. Oishi, Y. *et al.* Slow-wave sleep is controlled by a subset of nucleus accumbens core  
1283 neurons in mice. *Nat. Commun.* **8**, 1–12 (2017).
- 1284 67. Feinberg, D. A. *et al.* Multiplexed echo planar imaging for sub-second whole brain  
1285 fMRI and fast diffusion imaging. *PloS One* **5**, e15710 (2010).
- 1286 68. Moeller, S. *et al.* Multiband multislice GE-EPI at 7 tesla, with 16-fold acceleration  
1287 using partial parallel imaging with application to high spatial and temporal whole-brain  
1288 fMRI. *Magn. Reson. Med.* **63**, 1144–1153 (2010).
- 1289 69. Setsompop, K. *et al.* Blipped-controlled aliasing in parallel imaging for simultaneous  
1290 multislice echo planar imaging with reduced g-factor penalty. *Magn. Reson. Med.* **67**,  
1291 1210–1224 (2012).
- 1292 70. Glasser, M. F. *et al.* The minimal preprocessing pipelines for the Human Connectome  
1293 Project. *NeuroImage* **80**, 105–124 (2013).
- 1294 71. Brooks, J. C. W. *et al.* Physiological noise modelling for spinal functional magnetic  
1295 resonance imaging studies. *NeuroImage* **39**, 680–692 (2008).

- 1296 72. Smith, S. M., Hyvärinen, A., Varoquaux, G., Miller, K. L. & Beckmann, C. F. Group-  
1297 PCA for very large fMRI datasets. *Neuroimage* **101**, 738–749 (2014).
- 1298 73. Fitzgerald, P. B. & Daskalakis, Z. J. The effects of repetitive transcranial magnetic  
1299 stimulation in the treatment of depression. *Expert Rev. Med. Devices* **8**, 85–95 (2011).
- 1300 74. George, M. S. & Aston-Jones, G. Noninvasive techniques for probing neurocircuitry  
1301 and treating illness: vagus nerve stimulation (VNS), transcranial magnetic stimulation  
1302 (TMS) and transcranial direct current stimulation (tDCS). *Neuropsychopharmacol. Off.*  
1303 *Publ. Am. Coll. Neuropsychopharmacol.* **35**, 301–316 (2010).
- 1304 75. Rive, M. M. *et al.* Neural correlates of dysfunctional emotion regulation in major  
1305 depressive disorder. A systematic review of neuroimaging studies. *Neurosci. Biobehav.*  
1306 *Rev.* **37**, 2529–2553 (2013).
- 1307 76. Fox, M. D., Buckner, R. L., White, M. P., Greicius, M. D. & Pascual-Leone, A.  
1308 Efficacy of transcranial magnetic stimulation targets for depression is related to intrinsic  
1309 functional connectivity with the subgenual cingulate. *Biol. Psychiatry* **72**, 595–603  
1310 (2012).
- 1311 77. Aggleton, J. P., Burton, M. J. & Passingham, R. E. Cortical and subcortical afferents to  
1312 the amygdala of the rhesus monkey (*Macaca mulatta*). *Brain Res.* **190**, 347–368 (1980).
- 1313 78. Huntenburg, J. M., Bazin, P.-L. & Margulies, D. S. Large-Scale Gradients in Human  
1314 Cortical Organization. *Trends Cogn. Sci.* **22**, 21–31 (2018).
- 1315 79. Margulies, D. S. *et al.* Situating the default-mode network along a principal gradient of  
1316 macroscale cortical organization. *Proc. Natl. Acad. Sci. U. S. A.* **113**, 12574–12579  
1317 (2016).
- 1318 80. Dandekar, M. P., Fenoy, A. J., Carvalho, A. F., Soares, J. C. & Quevedo, J. Deep brain  
1319 stimulation for treatment-resistant depression: an integrative review of preclinical and  
1320 clinical findings and translational implications. *Mol. Psychiatry* **23**, 1094–1112 (2018).

- 1321 81. Riva-Posse, P. *et al.* A connectomic approach for subcallosal cingulate deep brain  
1322 stimulation surgery: prospective targeting in treatment-resistant depression. *Mol.*  
1323 *Psychiatry* **23**, 843–849 (2018).
- 1324 82. Amemori, K. & Graybiel, A. M. Localized microstimulation of primate pregenual  
1325 cingulate cortex induces negative decision-making. *Nat. Neurosci.* **15**, 776–785 (2012).
- 1326 83. Apps, M. A. J., Rushworth, M. F. S. & Chang, S. W. C. The Anterior Cingulate Gyrus  
1327 and Social Cognition: Tracking the Motivation of Others. *Neuron* **90**, 692–707 (2016).
- 1328 84. Wittmann, M. K., Lockwood, P. L. & Rushworth, M. F. S. Neural Mechanisms of  
1329 Social Cognition in Primates. *Annu. Rev. Neurosci.* **41**, 99–118 (2018).
- 1330 85. Averbeck, B. B. & Costa, V. D. Motivational neural circuits underlying reinforcement  
1331 learning. *Nat. Neurosci.* **20**, 505–512 (2017).
- 1332 86. Aarsland, D., Pålhlagen, S., Ballard, C. G., Ehrt, U. & Svenningsson, P. Depression in  
1333 Parkinson disease--epidemiology, mechanisms and management. *Nat. Rev. Neurol.* **8**,  
1334 35–47 (2011).
- 1335 87. Keuken, M. C. *et al.* Quantifying inter-individual anatomical variability in the subcortex  
1336 using 7 T structural MRI. *NeuroImage* **94**, 40–46 (2014).
- 1337 88. Lebow, M. A. & Chen, A. Overshadowed by the amygdala: the bed nucleus of the stria  
1338 terminalis emerges as key to psychiatric disorders. *Mol. Psychiatry* **21**, 450–463 (2016).
- 1339 89. Folloni, D. *et al.* Dichotomous organization of amygdala/temporal-prefrontal bundles in  
1340 both humans and monkeys. *eLife* **8**, e47175 (2019).
- 1341 90. Faull, O. K., Jenkinson, M., Ezra, M. & Pattinson, K. T. Conditioned respiratory threat  
1342 in the subdivisions of the human periaqueductal gray. *eLife* **5**, (2016).
- 1343 91. Edlow, B. L. *et al.* Neuroanatomic connectivity of the human ascending arousal system  
1344 critical to consciousness and its disorders. *J. Neuropathol. Exp. Neurol.* **71**, 531–546  
1345 (2012).

- 1346 92. Betts, M. J., Cardenas-Blanco, A., Kanowski, M., Jessen, F. & Düzel, E. In vivo MRI  
1347 assessment of the human locus coeruleus along its rostrocaudal extent in young and  
1348 older adults. *NeuroImage* **163**, 150–159 (2017).
- 1349 93. Gershon, R. C. *et al.* NIH Toolbox for Assessment of Neurological and Behavioral  
1350 Function. *Neurology* **80**, S2–S6 (2013).
- 1351 94. Salsman, J. M. *et al.* Emotion assessment using the NIH Toolbox. *Neurology* **80**, S76–  
1352 S86 (2013).
- 1353 95. Buysse, D. J., Reynolds, C. F., Monk, T. H., Berman, S. R. & Kupfer, D. J. The  
1354 Pittsburgh Sleep Quality Index: a new instrument for psychiatric practice and research.  
1355 *Psychiatry Res.* **28**, 193–213 (1989).
- 1356 96. Heine, S. J. & Buchtel, E. E. Personality: the universal and the culturally specific. *Annu.*  
1357 *Rev. Psychol.* **60**, 369–394 (2009).
- 1358 97. McCrae, R. R. & Costa Jr., P. T. A contemplated revision of the NEO Five-Factor  
1359 Inventory. *Personal. Individ. Differ.* **36**, 587–596 (2004).
- 1360 98. Gur, R. C. *et al.* A cognitive neuroscience based computerized battery for efficient  
1361 measurement of individual differences: Standardization and initial construct validation.  
1362 *J. Neurosci. Methods* **187**, 254–262 (2010).
- 1363 99. Cattell, R. B. The Scree Test For The Number Of Factors. *Multivar. Behav. Res.* **1**, 245–  
1364 276 (1966).
- 1365 100. Raïche, G., Blais, J. & Montréal, U. D. Non Graphical Solutions for the Cattell’s Scree  
1366 Test. in *Journal of Research Methods for the Behavioral and Social Sciences* 23–29  
1367 (2013).
- 1368 101. Smith, S. M. *et al.* A positive-negative mode of population covariation links brain  
1369 connectivity, demographics and behavior. *Nat. Neurosci.* **18**, 1565–1567 (2015).

1370  
1371

1372 **Table 1**, Behavioural markers and their loading onto the four factors  
1373

| No | Name                                                       | LifeSat | NegEmot | Sleep | Anger/<br>rejection |
|----|------------------------------------------------------------|---------|---------|-------|---------------------|
|    | <b>NIH Toolbox Emotion Battery (5-point scale)</b>         |         |         |       |                     |
| 1  | Anger Affect                                               | -0.04   | 0.63    | -0.08 | 0.21                |
| 2  | Anger Hostility                                            | -0.28   | 0.34    | -0.12 | 0.20                |
| 3  | Anger Aggression                                           | 0.09    | 0.09    | 0.05  | 0.39                |
| 4  | Fear Affect                                                | -0.17   | 0.82    | 0.01  | -0.16               |
| 5  | Feat Somatic                                               | 0.22    | 0.75    | -0.02 | -0.01               |
| 6  | Sadness                                                    | -0.31   | 0.67    | -0.04 | -0.03               |
| 7  | Life Satisfaction                                          | 0.64    | -0.10   | -0.20 | 0.02                |
| 8  | Mean Purpose                                               | 0.54    | -0.10   | -0.12 | 0.09                |
| 9  | Positive Affect                                            | 0.67    | -0.23   | -0.13 | 0.16                |
| 10 | Friendship                                                 | 0.67    | 0.06    | 0.07  | 0.02                |
| 11 | Loneliness                                                 | -0.51   | 0.15    | 0.00  | 0.26                |
| 12 | Perceived Hostility                                        | -0.03   | -0.11   | -0.05 | 0.91                |
| 13 | Perceived Rejection                                        | -0.41   | -0.14   | 0.00  | 0.66                |
| 14 | Emotional Support                                          | 0.81    | 0.24    | -0.08 | -0.10               |
| 15 | Instrumental Support                                       | 0.57    | 0.11    | -0.05 | -0.01               |
| 16 | Perceived Stress                                           | -0.30   | 0.48    | 0.01  | 0.25                |
| 17 | Self-Efficacy                                              | 0.57    | -0.23   | 0.23  | 0.03                |
|    | <b>Pittsburgh Sleep Questionnaire (scale from 0-9)</b>     |         |         |       |                     |
| 18 | minutes to fall asleep (past month)                        | -0.12   | -0.12   | 0.74  | -0.09               |
| 19 | hours of sleep per night (past month)                      | 0.10    | 0.16    | -0.30 | -0.16               |
| 20 | sleep trouble: can't go to sleep within 30 minutes         | -0.10   | -0.04   | 0.71  | -0.02               |
| 21 | sleep trouble: wake-up in middle of night or early morning | 0.08    | 0.05    | 0.55  | 0.04                |
| 22 | sleep trouble: had bad dreams                              | 0.04    | 0.23    | 0.27  | 0.09                |
| 23 | overall sleep quality                                      | 0.00    | 0.08    | 0.53  | 0.07                |
| 24 | how often taken sleep medicine                             | 0.10    | 0.19    | 0.35  | -0.12               |
| 25 | how often trouble staying awake during the day             | -0.04   | 0.13    | 0.09  | 0.19                |
| 26 | how often trouble keeping up enthusiasm during the day     | -0.11   | 0.45    | 0.17  | -0.12               |
|    | <b>5-factor model</b>                                      |         |         |       |                     |

|    |                                            |       |       |       |       |
|----|--------------------------------------------|-------|-------|-------|-------|
| 27 | agreeableness                              | -0.01 | -0.05 | 0.03  | -0.51 |
| 28 | openness                                   | 0.13  | 0.21  | -0.03 | -0.08 |
| 29 | conscientiousness                          | 0.05  | -0.45 | 0.15  | -0.03 |
| 30 | neuroticism                                | -0.35 | 0.55  | 0.01  | 0.02  |
| 31 | extroversion/introversion                  | 0.47  | -0.09 | 0.05  | 0.03  |
|    | <b>Penn Emotion<br/>Recognition Test</b>   |       |       |       |       |
| 32 | number of correct anger<br>identifications | -0.03 | 0.10  | 0.00  | -0.09 |
| 33 | number of correct fear<br>identifications  | -0.09 | 0.00  | -0.02 | -0.13 |

1374

1375



## 1376 **Supplement**

### 1377 **Supplementary Note 1: Histogram of contributions**

1378           We also examined histograms of, first, the contributions (**Fig 4C**) and, second, the  
1379 underlying raw correlation coefficients across the  $k=10,000$  regression models (**Fig 4D**). The  
1380 distribution of the contributions across connections (**Fig 4C**) had a small tail to the right  
1381 indicating a small number of predictive connections. Overall, the distributions were  
1382 comparable across behaviours, although life satisfaction (blue) and sleep (green) had a slightly  
1383 longer tail towards the right, indicating the existence of stronger predictors than for negative  
1384 emotions and anger (95% confidence intervals: lifeSat: [-.044,.119], negEmot: [-.043,.102],  
1385 sleep: [-.042,.101], anger: [-.036,.076]; consistent with **Fig5A**). The mode of the distributions  
1386 was slightly to the left of zero, probably due to overfitting the training data when using non-  
1387 predictive connections in the model which then generalize less well to the testing data  
1388 (lifeSat: -.03, negEmot: -.03, sleep: -.02, anger: -.02). The raw correlation coefficients obtained  
1389 across models (**Fig 5C**) were shifted slightly to the right of zero (mode: lifeSat: .02, negEmot:  
1390 .02, sleep: .04, anger: .08), as expected if any of the connections meaningfully contribute to  
1391 predict behaviour. The distribution for anger was shifted the most, indicating a larger number  
1392 of connections, and thus a larger brain network, might help predict this behaviour.

1393 **Supplementary Figure 1 – related to Figure 1**

**A** Additional data clean-up to correct for physiological noise

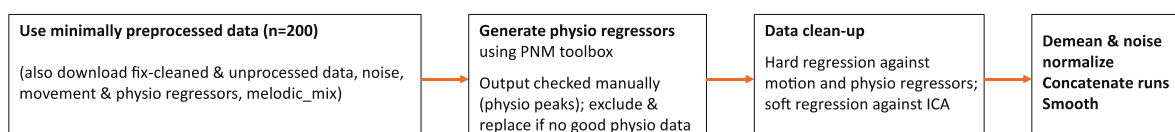

**B** Signal to noise improvements

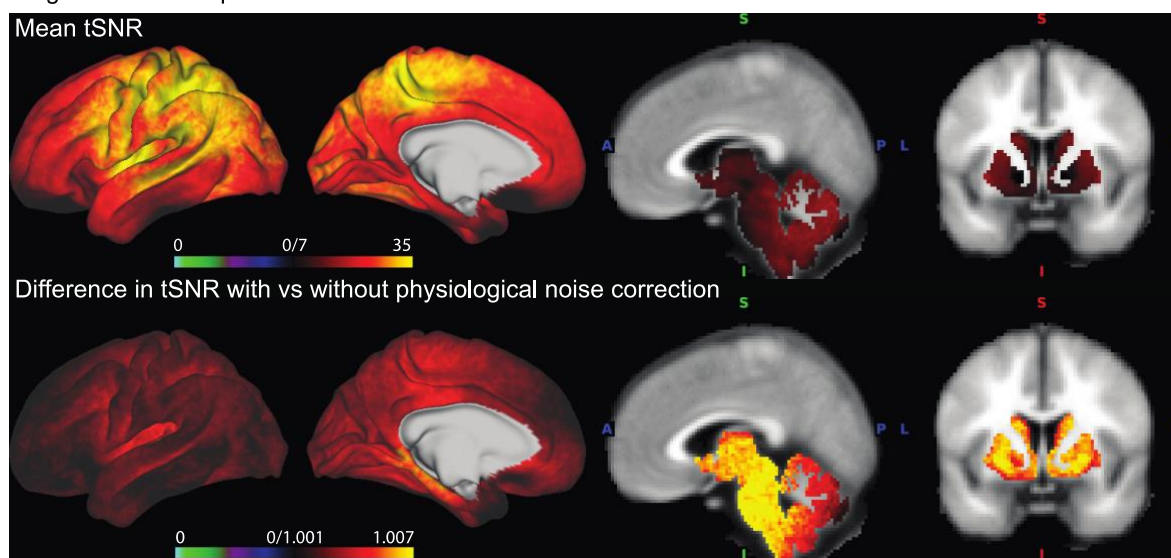

**C** Generation of group average dense connectome for amygdala parcellation

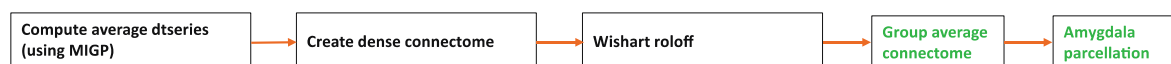

**D** Amygdala parcellation step by step

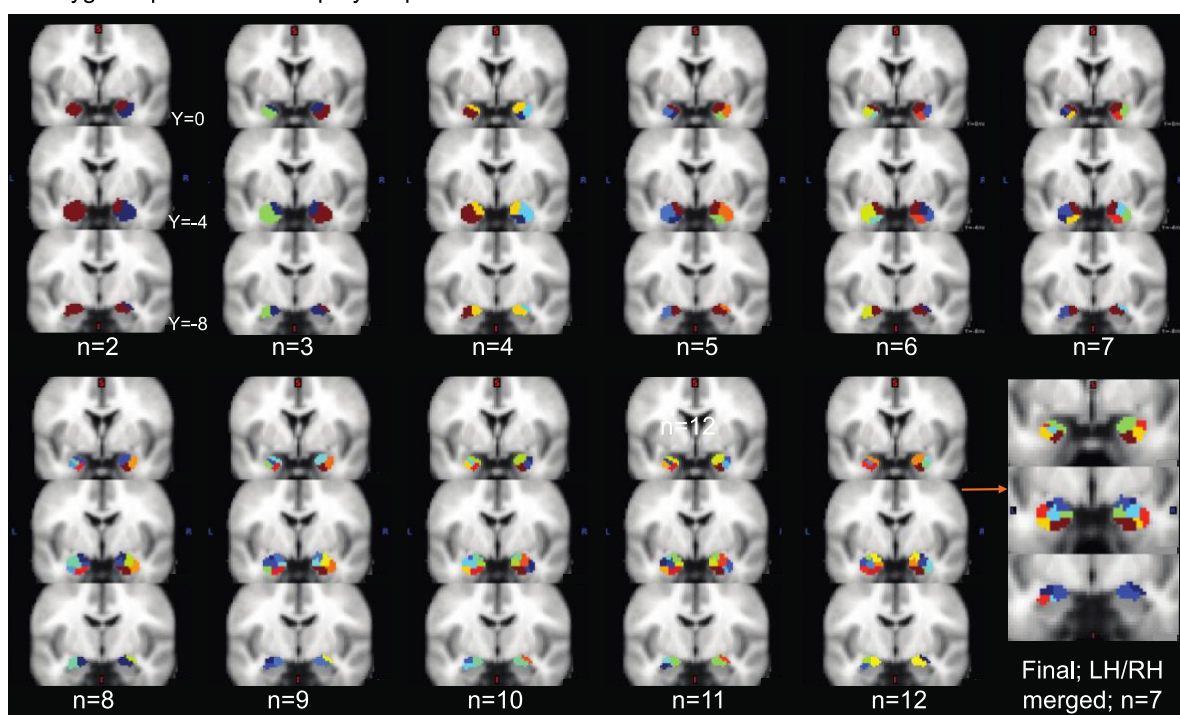

1394

1395 **Supplementary Figure 1, Preprocessing and hierarchical clustering pipelines,**  
1396 **A,** The minimally preprocessed HCP data was additionally corrected for  
1397 physiological noise to improve the signal in temporal lobe and brainstem regions, the  
1398 key areas for this study. All other data clean-up steps usually applied to generate  
1399 fully preprocessed HCP data, specifically fix-denoising and motion correction, were  
1400 applied at the same time. **B,** Illustration of the signal-to-noise improvements gained  
1401 from this additional preprocessing step compared to standard full HCP  
1402 preprocessing (in a subset of 100 participants). *Top:* Mean temporal signal to noise  
1403 ratio (tSNR) obtained following our preprocessing pipeline; *Bottom:* Difference in  
1404 tSNR between the preprocessing with and without physiological noise correction.  
1405 The ratio of tSNRs (physio – noPhysio) / (physio + noPhysio) is illustrated. This  
1406 shows tSNR gains in medial temporal lobe and medial prefrontal cortex but  
1407 particularly subcortical and brainstem structures. **C,** Summary of the additional  
1408 processing steps required to compute a group average connectome from the 200  
1409 individual concatenated resting-state fMRI (rs-fMRI) time-series. The group  
1410 connectome, restricted to connectivity between amygdala voxels and the whole  
1411 brain, formed the basis for the amygdala parcellation. **D,** Individual steps of the  
1412 hierarchical clustering algorithm led to increasing subdivisions of the amygdala. All  
1413 steps leading up to our final parcellation are shown. Hierarchical clustering was  
1414 performed on absolute connectivity values. Note, for example, the central nuclei  
1415 splitting off in step 9 (left) and 12 (right). The 12 cluster solution had five unique  
1416 clusters in each hemisphere and two connected clusters (same color = same  
1417 cluster). For subsequent analyses, the corresponding clusters in each hemisphere  
1418 were joined, resulting in a total of seven clusters.

1419 **Supplementary Figure 2 - related to Figure 3**

1420

**A** Included behavioral markers

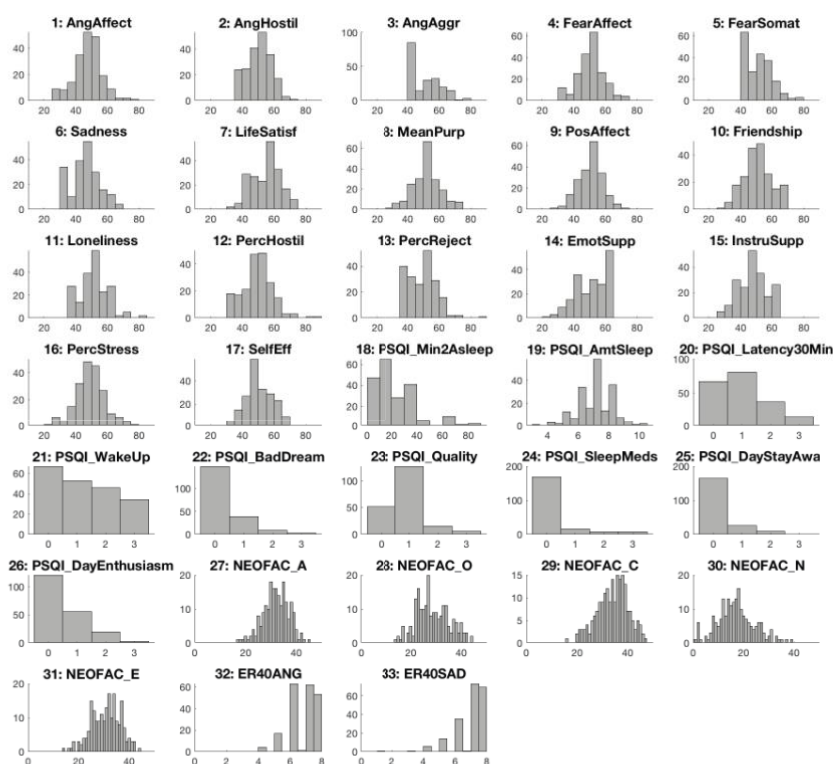

**B** Extracted latent behaviors

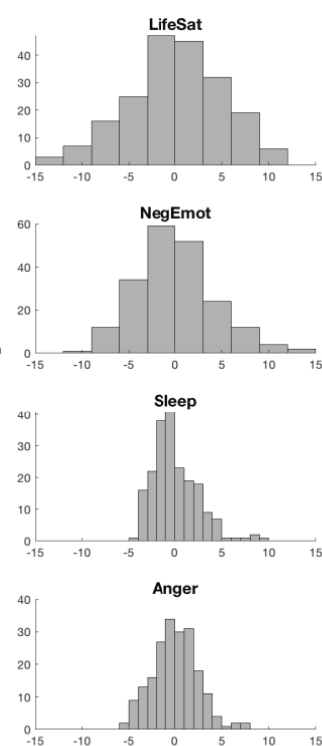

1421

1422

1423

1424

1425

1426

**Supplementary Figure 2, Distribution of behavioural scores and extracted latent behaviours, A,** Distribution of all behavioural markers included in the factor analysis shown in Figure 3 across the 200 HCP participants. For a full description of each score see Table 1 and Methods. **B,** Distribution of the latent behaviours generated from the factor analysis.

1427

### Supplementary Figure 3 – related to Figure 4

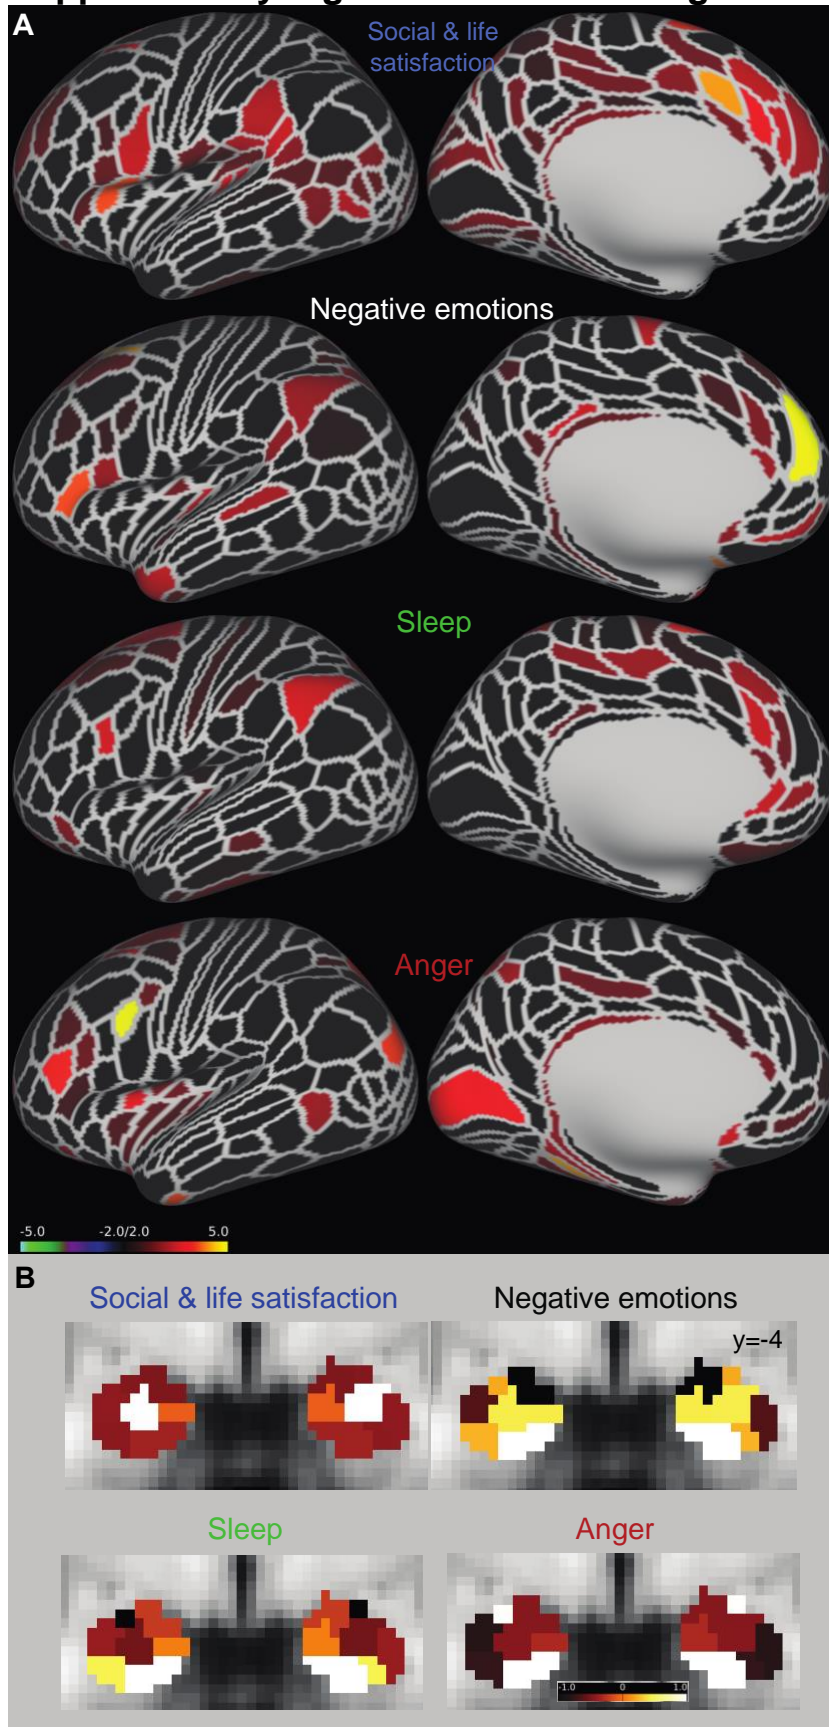

1428

1429 **Supplementary Figure 3, related to Figure 4, Maps of cortex and amygdala**  
1430 **illustrate maximal contributions towards behavioural predictions, A,** The  
1431 distribution of *rDiff* values is shown for the entire cortex. *rDiff* values were z-scored  
1432 across behaviours and connections. Each cortical parcel displays the *rDiff* value  
1433 associated with the connection to the amygdala nucleus that was maximal for this  
1434 cortical region. **B,** The contribution of the seven amygdala nuclei to each behaviour  
1435 is shown. The values shown in the different colours summarize the contribution *rDiff*  
1436 of connections with this nucleus for any instances when the connection with this  
1437 nucleus was the top connection (out of all seven nuclei). Again, contribution values  
1438 were z-scored across behaviours and connections.

1439 **Supplementary Figure 4 – related to Figure 5**

1440

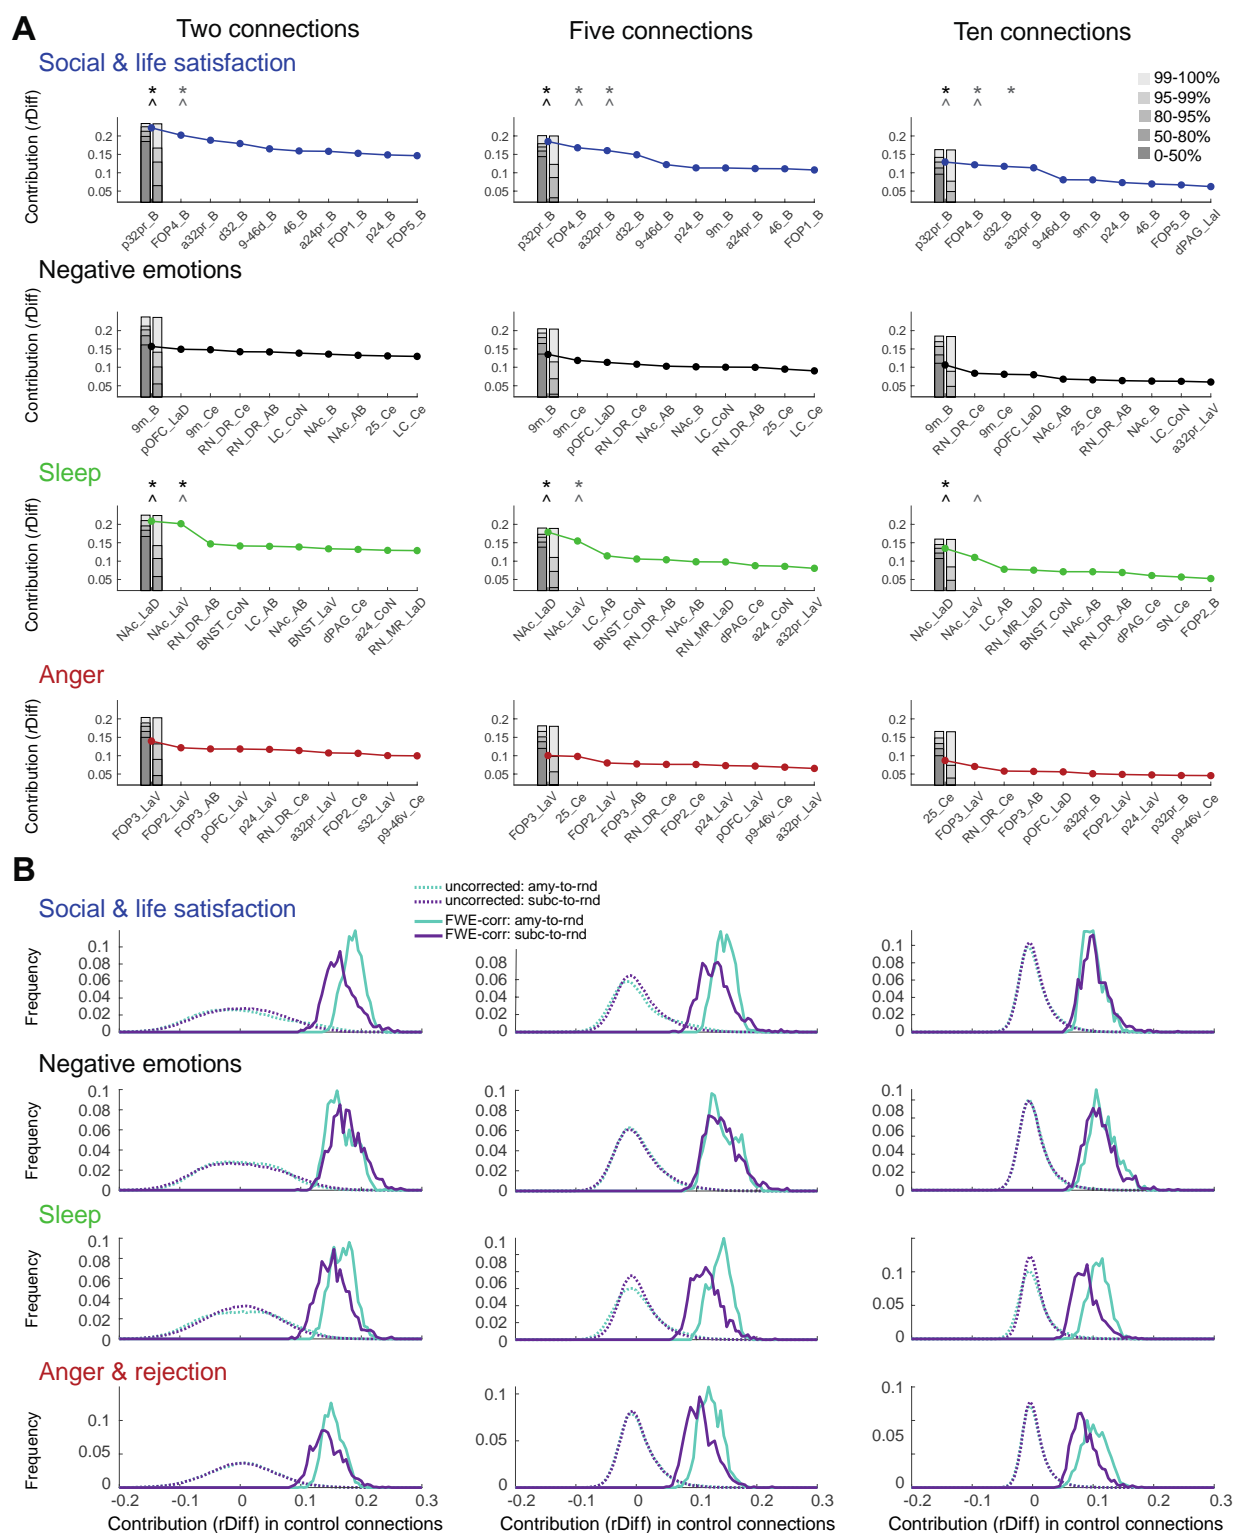

1441

1442

1443 **Supplementary Figure 4, related to Figure 5, Predictions are robust to model**

1444 **size, A,** Our main result in Figure 5A was obtained from 10,000 models with five

1445 randomly chosen connections each (reproduced here for comparison: middle

1446 column). We did not have enough data to optimize the number of connections

1447 included in each model as an additional hyperparameter. For transparency, here we

1448 therefore show the results for models involving only two (left column) or ten (right  
1449 column) randomly selected connections in each of 10,000 model iterations. While  
1450 small differences exist (such as the order of the top two connections flipping for  
1451 Anger), none of the key results discussed in the paper are dependent on the  
1452 selection of model size. As would be expected, an individual connection predicts  
1453 slightly less variance (smaller *rDiff*), on average, when more regressors are included  
1454 in the model (moving from left to right columns). **B**, However, this is taken into  
1455 consideration in the generation of the respective control distributions which are used  
1456 to establish significance (for more details, see Supplementary Figure 6).



1457 **Supplementary Figure 5 – related to Figure 5**

1458

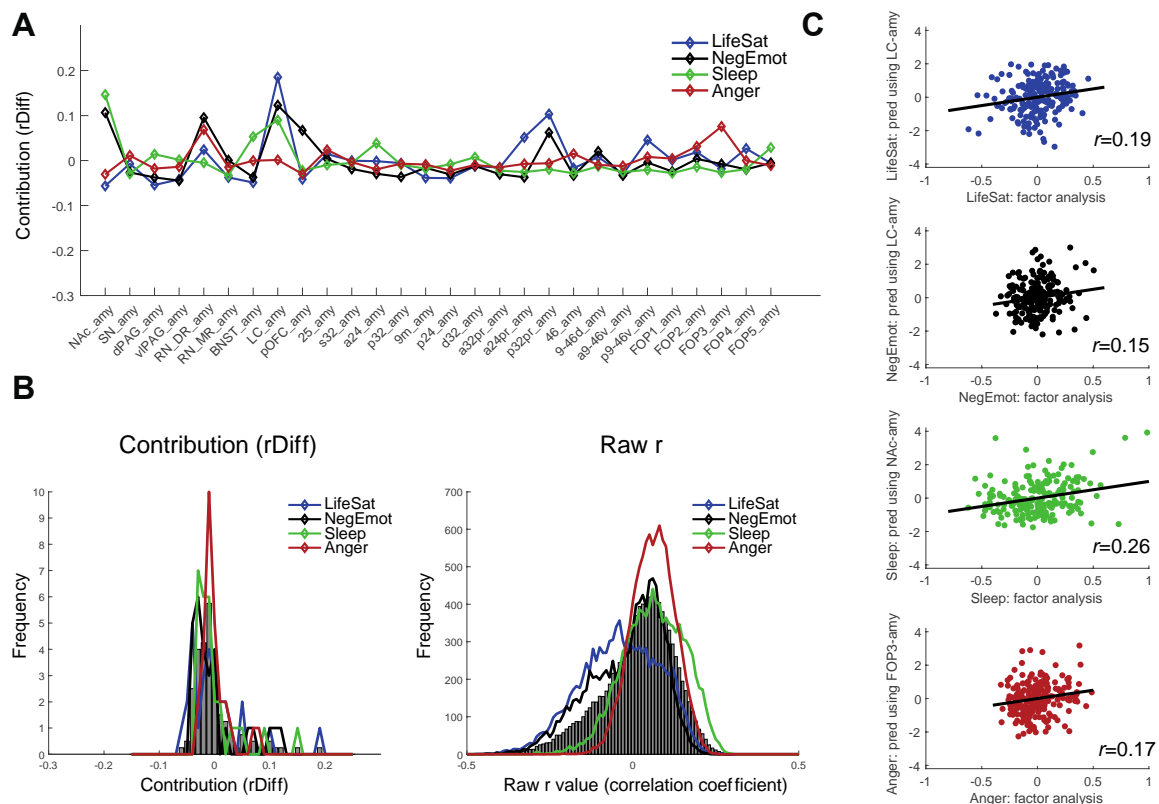

1459

1460

1461 **Supplementary Figure 5, Mental well-being predictions benefit from**

1462 **parcellating the amygdala**, To confirm that parcellating the amygdala into sub-  
 1463 nuclei increased our specificity for predicting mental well-being, we repeated the  
 1464 regression procedure using connections with the entire amygdala to the same 28  
 1465 ROIs (see also **Figure 5B**). **A**, This highlighted LC-amy connectivity as important for  
 1466 predicting all latent behaviours except anger, NAc-amy connections for negative  
 1467 emotions and sleep and RN\_DR-amy connections for negative emotions and anger,  
 1468 and thus primarily subcortical connections. Cortically, p32pr-amy connections were  
 1469 predictive of life satisfaction and negative emotions and FOP3-amy connection for  
 1470 anger. **B**, Histogram of contributions *rDiff* and raw *r* values are shown as in Figure  
 1471 4C-D. **C**, The true behaviour obtained from the factor analysis is plotted against the  
 1472 behaviour predicted, in each case, using only the top connection with the whole  
 1473 amygdala. In summary, the anatomical specificity gained from parcellating the  
 1474 amygdala improved the prediction of mental well-being in the majority of cases  
 1475 (compare also **Figure 5A-B**).

1476

1477 **Supplementary Figure 6 – related to Figure 5**

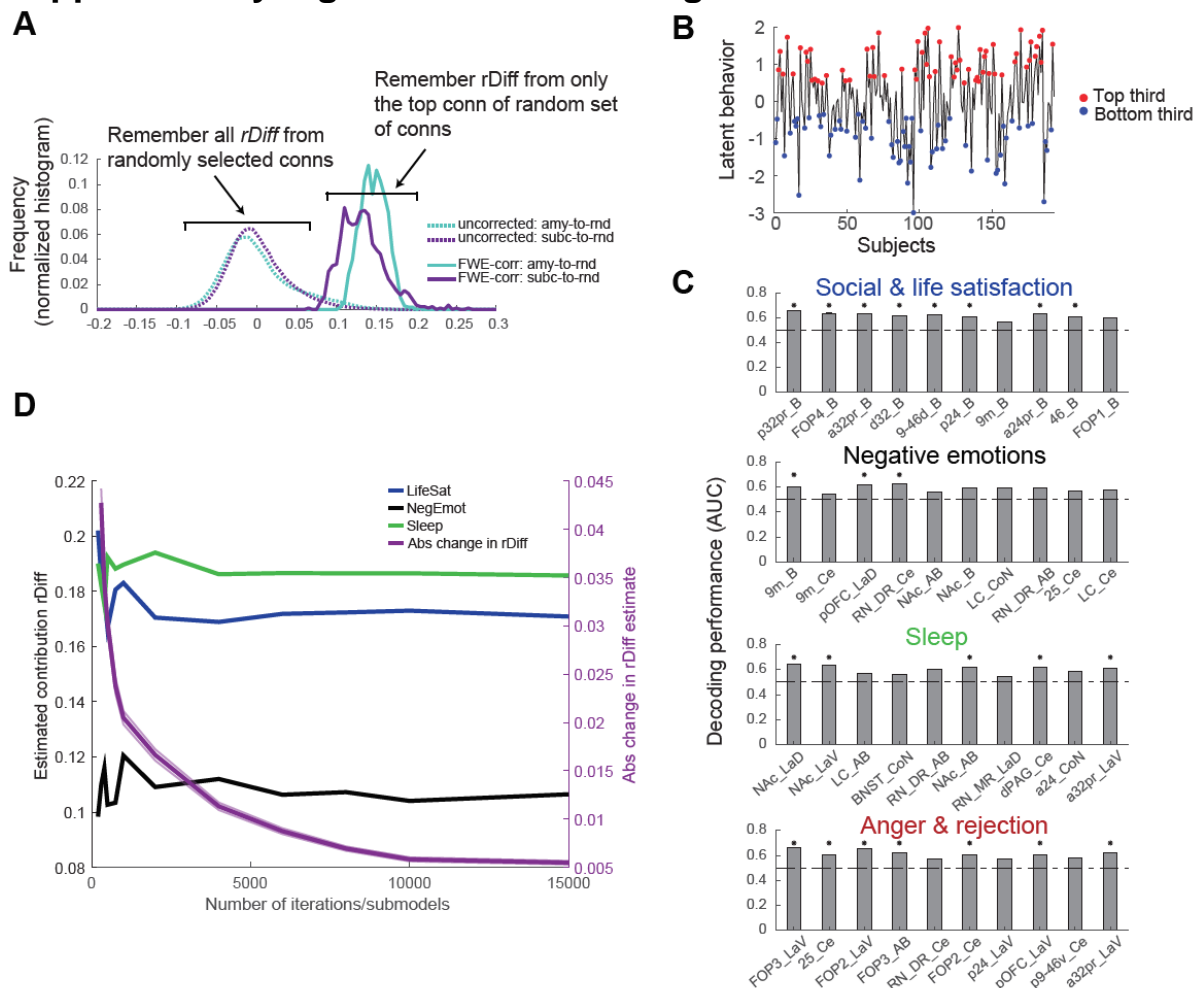

1478 **Supplementary Figure 6, Illustration of statistical tests and iterations to**  
 1479 **convergence** **A**, We used two control analyses based on randomly selected  
 1480 connections, in each case matching the number of connections from our original  
 1481 amygdala-to-ROI analysis (7x28=196). In one case, random amygdala-to-cortex  
 1482 hubs with 28 cortical regions were created (“amy-to-rnd”), in the second case,  
 1483 random subcortical seeds of the same size as the original amygdala nuclei were  
 1484 defined, and hubs with these seven ‘fake’ nuclei and 28 randomly chosen cortical  
 1485 regions were constructed (“subc-to-rnd”). To generate uncorrected p-values, all 196  
 1486 *rDiffs* were remembered in each of the 1000 random connection hubs and the  
 1487 resulting distributions are shown in the dashed lines and centred on 0. To correct for  
 1488 the number of connections tested (196), for each of the 1000 random hubs, we only  
 1489 remembered the top connection’s contribution. This led to the FWE-corrected  
 1490 distributions shown in the continuous line. In both cases, FWE-corrected and  
 1491 uncorrected p-values were generated using the cumulative distribution function (cdf)  
 1492 of the respective distributions. Distributions are shown exemplarily for life satisfaction  
 1493 here, but see Supplementary Figure 4B for all other behaviours. **B**, In an additional  
 1494 analysis, for comparison with other work that employs decoding techniques, we  
 1495 selected the top and bottom third of participants for each latent behaviour. This was  
 1496 done in order to maximize differences between our participants; note that our  
 1497 participants scored in a relatively narrow, sub-clinical range. Latent behavioural  
 1498 scores were binarized (1=high, 0=low). **C**, For the top 10 connections for each  
 1499 behaviour, the area under the curve (AUC) and thus decoding performance is  
 1500

1501 shown. We were able to decode whether a participant was in the top or bottom third  
1502 using multiple of the individual connections for all four latent behaviours. Significance  
1503 was established using shuffled behavioural and connectivity values (see Methods  
1504 and **Figure 5D**). **D**, The number of sub-models with five connections that were  
1505 estimated to determine each connections' contribution (*rDiff*) was set to  $k=10,000$ .  
1506 To validate this choice, here we show (left y axis) the *rDiff* estimated for three  
1507 somewhat relevant connections (d32-B for lifeSat, 25-Ce for NegEmot and NAc-LaV  
1508 for sleep) as a function of the number of iterations/submodels that were estimated.  
1509 This highlights that estimates of *rDiff* become more and more stable the more  
1510 models are estimated. The right y axis shows the mean absolute difference in *rDiff*  
1511 across all 196 connections that is seen between two subsequent choices of  $k$ . This  
1512 shows that after about 8,000 iterations, estimates of *rDiff* hardly change, and that at  
1513 10,000 iterations, these estimates are robust and have converged.
